# Supplementary material for: Tandem anionic Michael addition/radical cyclizations: a new and efficient strategy for the synthesis of functionalized cyclopentanes
Source: Royal Society of Chemistry journal article supplement (doi:10.1039/b104415j), 2001-01-01
Supplement: b104415j.doc [file b104415j.doc]

**Tandem Anionic Michael Addition/Radical Cyclizations: A New and Efficient Strategy**

**for the Synthesis of Functionalized Cyclopentanes**

Ullrich Jahn

**Electronic Supplementary Information**

**General**: All reactions were conducted in flame dried glass ware under nitrogen atmosphere. THF, HMPA, and diisopropylamine were dried after standard methods. TLC plates POLYGRAM SIL G/UV254 (Macherey-Nagel) were used for monitoring reactions. Chromatographic separations were performed on silica gel 60 (Fluka, 230 - 400 mesh) with *n*-hexane/ethyl acetate as eluent in the given ratio. Melting points are uncorrected. IR spectra were taken on a Nicolet DX-320 FT-IR spectrometer. 1H and 13C NMR spectra were recorded in CDCl3, unless otherwise noted, on Bruker DRX 400 or AC 200 spectrometers at 400 or 200, and 100 or 50 MHz, respectively. Connectivity was determined by 1H-1H COSY experiments. 13C NMR assignments were obtained from DEPT and C,H-correlation experiments. EI-mass spectra were recorded on a Finnigan MAT 8430 and MAT 8400 spectrometer at 70 eV. Combustion analyses were performed at the Microanalytical Laboratories of the Technical University of Braunschweig.

The following numbering scheme for the NMR assignment of compounds **7-18** was applied:

Configuration assignments are based on NOE studies. Although the R*,S* nomenclature was used to assign configuations, all compounds are racemic.

*anti-***Selective Michael Addition of 1a-e to 2a-c (General Procedure):**

To a solution of 209 l (1.6 mmol) *i*-Pr2NH in 10 ml dry THF was added 1 ml (1.6 mmol) *n*-BuLi (1.6*M* in hexane) at -78oC under N2. After stirring for 30 min, 2.53 ml dry HMPA was added *via* syringe. A solution of 1.25 mmol ester **1a-e** in 0.5 ml dry THF was added *via* syringe (final concentration 75 m*M*). The reaction mixture was stirred for 30 min at -78oC and 1 mmol **2a**, **b** or **c** was added. The pale yellow, clear reaction mixture was stirred at -78oC for 30 min and then slowly warmed to a maximum temperature of 0oC until the reaction was complete by tlc (ca. 1.5 h). The reaction mixture was quenched with four drops of water, stirred for 5 min, diluted with the same amount of ether and filtered through a plug of silica gel. The solvent was evaporated and the thick oil was purified by column chromatography (silica gel, hexane/EtOAc 20:1, gradient to 10:1) to give traces of -ketoester resulting from self condensation of **1**, followed by *anti/syn*-mixture of Michael adducts **3aa-eb**. For yields and diastereomeric ratios see Table 2.

Alternatively, the setup of the tandem sequence was increased to 1.3 mmol **2** as the limiting reagent with the same ratio of components in a graded flask under otherwise identical conditions. Immediately prior to oxidative cyclization, the excess solution larger than 1 mmol was withdrawn from the flask, and worked up as described before to obtain the diastereomeric ratio of the actual tandem sequence. For yields and diastereomeric ratios see Table 2.

*syn-***Selective Michael Addition of 1a-e to 2a-c (General Procedure):**

To a solution of 209 l (1.6 mmol) *i*-Pr2NH in 13 ml dry THF was added 1 ml (1.6 mmol) *n*-BuLi (1.6*M* in hexane) at -78oC under N2. After stirring for 30 min, a solution of 1.25 mmol ester **1a-e** in 0.5 ml dry THF was added *via* syringe (final concentration 75 m*M*). The reaction mixture was stirred for 30 min at -78oC and 224 l (1 mmol) **2a** was added. The pale yellow, clear reaction mixture was stirred at -78oC for 30 min and then slowly warmed to a maximum temperature of 0oC until the reaction was complete by tlc (ca. 1.5 h). The reaction mixture was quenched with four drops of water, stirred for 5 min, diluted with ether to the double volume and filtered through a plug of silica gel. The solvent was evaporated and the thick oil was purified by column chromatography (silica gel, hexane/EtOAc 20:1, gradient to 10:1) to give some -ketoester resulting from self condensation of **1**, followed by a *syn/anti*-mixture of Michael adducts **3**. For yields and diastereomeric ratios, see Table 2.

***Table 2****. Michael Additions of Enolates (Z)-****1*** *or (E)-****1*** *to -Unsaturated Carbonyl Compounds* ***2a-c****.*

| Entry | Enolate | **2** | Solvent | **3** % | *anti/syn* |
| --- | --- | --- | --- | --- | --- |
| 1 | *(Z)-***1a** | **a** | THF/HMPA | **aa** 96 | 6.6:1 |
| 2 | *(E)-***1a** | **a** | THF | **aa** 58 | 1:1.85 |
| 3 | *(Z)-***1a** | **c** | THF/HMPA | **ac** 84 | 7.5:1 |
| 4 | *(Z)-***1b** | **a** | THF/HMPA | **ba** 95 | 8.9:1 |
| 5 | *(Z)-***1d** | **a** | THF/HMPA | **da** 77 | 11.8:1 |
| 6 | *(E)-***1d** | **a** | THF | **da** 90 | 1:2.2 |
| 7 | *(Z)-***1e** | **a** | THF/HMPA | **ea** 93 | 11.0:1 |
| 8 | *(Z)-***1e** | **b** | THF/HMPA | **eb** 92 | 4.6:1 |

*anti/syn-***Diethyl 2-[2-(Methoxycarbonyl)-1-phenylpent-4-en-1-yl]malonate 3aa**:

Colorless oil. - IR (film): 3065, 3032, 2983, 2952, 1736, 1455, 1370, 1258, 1242, 1220, 1196, 1175, 1032, 704. - *anti*-**3aa**: 1H NMR (400 MHz):  = 0.80 (t, *J* = 7.1 Hz, 3 H, OCH2C*H*3); 1.21 (t, *J* = 7.1 Hz, 3 H, OCH2C*H*3); 2.06 (m, 1 H, =CH-C*H*); 2.22 (m, 1 H, =CH-C*H*); 2.98 (ddd, *J* = 8.3, 6.6, 4.9 Hz, 1 H, MeOOCCH); 3.54 (s, 3 H, OCH3); 3.64 (dd, *J* = 11.3, 4.9 Hz, 1 H, PhCH); 3.77 (2 q, *J* = 7.1 Hz, 2 H, OCH2); 4.11 (d, *J* = 11.3 Hz, 1 H, (EtOOC)2CH); 4.17 (2 q, *J* = 7.1 Hz, 2 H, OCH2); 5.00 (m, 2 H, =CH2); 5.68 (m, 1 H, =CH); 7.04 (m, 2 H, Ph); 7.16 (m, 3 H, Ph). - 13C NMR (100 MHz):  = 13.5 (q, OCH2*C*H3), 14.0 (q, OCH2*C*H3), 34.0 (t, =CH*C*H2), 46.4, 47.1 (2 d, PhCH, MeOOC*C*H), 51.3 (q, OCH3), 55.3 (d, (EtOOC)2*C*H), 61.2 (t, OCH2), 61.6 (t, OCH2), 117.2 (t, =CH2), 127.4 (d, *p*-Ph), 128.0 (d, Ph), 129.0 (d, Ph), 135.3 (d, =CH), 136.9 (s, Ph), 167.6 (s, COOEt), 168.1 (s, COOEt), 173.1 (s, COOMe). - *syn*-**3aa**: 1H NMR (400 MHz):  = 0.89 (t, *J* = 7.1 Hz, 3 H, OCH2C*H*3); 1.14 (t, *J* = 7.0 Hz, 3 H, OCH2C*H*3); 1.96 (m, 1 H, =CH-C*H*); 2.09 (m, 1 H, =CH-C*H*); 2.90 (ddd, *J* = 8.6, 6.9, 3.5 Hz, 1 H, MeOOCCH); 3.56 (s, 3 H, OCH3); 3.73 (dd, *J* = 9.4, 8.6 Hz, 1 H, PhCH); 3.81 (q, *J* = 7.1 Hz, 2 H, OCH2); 3.85 (d, *J* = 9.4 Hz, 1 H, (EtOOC)2CH); 4.07 (q, *J* = 7.0 Hz, 2 H, OCH2); 4.84 (m, 2 H, =CH2); 5.55 (m, 1 H, =CH); 7.16 (m, 5 H, Ph). - 13C NMR (100 MHz):  = 13.55 (q, OCH2*C*H3), 13.8 (q, OCH2*C*H3), 33.5 (t, =CH*C*H2), 46.6, 48.7 (2 d, PhCH, MeOOC*C*H), 51.4 (q, OCH3), 55.8 (d, (EtOOC)2*C*H), 61.1 (t, OCH2), 61.5 (t, OCH2), 116.8 (t, =CH2), 127.35 (d, *p*-Ph), 128.2 (d, Ph), 129.0 (d, Ph), 135.0 (d, =CH), 137.8 (s, Ph), 167.3 (s, COOEt), 167.8 (s, COOEt), 173.7 (s, COOMe). - MS, *m/z* (%): 362 (M+, 6), 331 (12), 321 (25), 302 (94), 289 (48), 256 (41), 250 (52), 229 (70), 210 (28), 203 (44), 182 (38), 176 (37), 155 (65), 143 (66), 131 (100), 103 (48), 91 (31), 77 (22). - C20H26O6 (362.43): calcd. C 66.28 H 7.23; found C 66.34 H 7.36.

*anti/syn-***Methyl 2-Allyl-5-oxo-3,5-diphenylpentanoate 3ac**:

Colorless Crystals, mp. 68-71oC. - IR (KBr): 3066, 3053, 2946, 2934, 1726, 1682, 1449, 1364, 1253, 1181, 1163, 746, 703, 684. - *anti*-**3ac**:1H NMR (400 MHz):  = 2.28 (m, *2J* = 14.3 Hz, 1 H, =CHC*H*2); 2.39 (m, *2J* = 14.3 Hz, 1 H, =CHC*H*2); 2.85 (dddd, *J* = 9.7, 7.3, 7.2, 5.0 Hz, 1 H, CHCOOMe); 3.36 (dd, *J* = 17.3, 8.0 Hz, 1 H, C*H*2COPh); 3.40 (s, 3 H, OCH3); 3.52 (dd, *J* = 17.3, 5.8 Hz, 1 H, C*H*2COPh); 3.71 (m, 1 H, CHPh); 4.98 (dd, *J* = 10.2, 0.5 Hz, 1 H, =CH2); 5.03 (dd, *J* = 17.1, 1.5 Hz, 1 H, =CH2); 5.72 (ddt, *J* = 17.1, 10.2, 6.9 Hz, 1 H, =CH); 7.16 (m, 5 H, CHPh); 7.35 (m, 3 H, COPh); 7.85 (m, 2 H, COPh). - 13C NMR (50 MHz):  = 34.1 (t, *C*H2CH=), 41.7 (t, *C*H2CO), 42.5 (d, *C*HCOO), 50.7 (d, PhCH), 51.2 (q, OCH3), 117.1 (t, =CH2), 126.9 (d, *p*-PhCH), 127.98 (d, Ph), 128.2 (d, Ph), 128.3 (d, Ph), 128.55 (d, Ph), 133.0 (d, *p*-PhCO), 135.4 (d, =CH), 137.1 (s, PhCH), 141.5 (s, PhCO), 174.0 (s, COO), 198.2 (s, PhCO). - *syn*-**3ac**: 1H NMR (400 MHz): = 1.96 (ddd, *J* = 14.1, 5.8, 4.4 Hz, 1 H, =CHC*H*2); 2.16 (ddd, *J* = 14.1, 10.2, 8.0 Hz, 1 H, =CHC*H*2); 2.79 (ddd, *J* = 10.3, 6.3, 4.0 Hz, 1 H, CHCOOMe); 3.22 (dd, *J* = 16.5, 4.3 Hz, 1 H, C*H*2COPh); 3.36 (m, 1 H, C*H*2COPh); 3.60 (m, 1 H, CHPh); 3.61 (s, 3 H, OCH3); 4.89 (2 d, *J* = 17.1, 10.3 Hz, 2 H, =CH2); 5.59 (m, 1 H, =CH); 7.16 (m, 5 H, CHPh); 7.45 (m, 3 H, COPh); 7.79 (m, 2 H, COPh). - 13C NMR (50 MHz):  = 35.2 (t, *C*H2CH=), 43.3 (d, *C*HCOO), 43.4 (t, *C*H2CO), 51.6 (d, q, 2 C, PhCH, OCH3), 116.9 (t, =CH2), 126.9 (d, *p*-PhCH), 128.03 (d, Ph), 128.1 (d, Ph), 128.51 (d, Ph), 128.55 (d, Ph), 132.9 (d, *p*-PhCO), 134.9 (d, =CH), 136.9 (s, PhCH), 141.6 (s, PhCO), 174.9 (s, COO), 197.8 (s, PhCO). - MS, *m/z* (%): 322 (M+, 10), 281 (21), 249 (16), 209 (21), 105 (100), 77 (38). - C21H22O3 (322.40): calcd. C 78.23 H 6.88; found C 78.10 H 6.88.

*anti/syn-***Diethyl 2-[2-(Ethoxycarbonyl)-1,5-diphenylpent-4-en-1-yl]malonate 3ba**:

Colorless oil. - IR (film): 3062, 3030, 2983, 2938, 1751, 1733, 1496, 1455, 1370, 1302, 1260, 1212, 1177, 1097, 1031, 745, 702. - *(E)-anti*-**3ba**:1H NMR (400 MHz):  = 0.84 (t, *J* = 7.2 Hz, 3 H, OCH2C*H*3); 1.11 (t, *J* = 7.1 Hz, 3 H, OCH2C*H*3); 1.24 (t, *J* = 7.1 Hz, 3 H, OCH2C*H*3); 2.26 (m, 1 H, =CH-C*H*); 2.40 (m, 1 H, =CH-C*H*); 3.10 (dt, *J* = 8.7, 5.7 Hz, 1 H, EtOOCCH); 3.71 (dd, *J* = 11.2, 5.4 Hz, 1 H, PhCH); 3.81 (2 q, *J* = 7.1 Hz, 2 H, OCH2); 4.01 (dq, *J* = 10.8, 7.2 Hz, 2 H, OCH2); 4.14 (d, *J* = 11.1 Hz, 1 H, (EtOOC)2CH); 4.20 (q, *J* = 7.2 Hz, 2 H, OCH2); 6.09 (dt, *J* = 15.7, 7.1 Hz, 1 H, =CH); 6.35 (d, *J* = 15.8 Hz, 1 H, =CHPh); 7.11-7.29 (m, 10 H, Ph). - 13C NMR (100 MHz):  = 13.6 (q, OCH2*C*H3), 14.0 (q, 2 C, 2 OCH2*C*H3), 33.6 (t, =CH*C*H2), 46.8, 47.6 (2 d, PhCH, EtOOC*C*H), 55.5 (d, (EtOOC)2*C*H), 60.4 (t, OCH2), 61.23 (t, OCH2), 61.6 (t, OCH2), 126.1 (d, Ph), 127.1 (d, 2 C), 127.5 (d), 128.0 (d, Ph), 128.42 (d, Ph), 129.2 (d, Ph), 132.3 (d, =CH), 137.0 (s, Ph), 137.4 (s, Ph), 167.7 (s, COOEt), 168.2 (s, COOEt), 172.7 (s, COOEt). - *(E)-syn*-**3ba**:1H NMR (400 MHz):  = 0.95 (t, *J* = 7.1 Hz, 3 H, OCH2C*H*3); 1.18 (t, *J* = 7.1 Hz, 6 H, 2 OCH2C*H*3); 2.33 (m, 2 H, =CH-C*H2*); 3.02 (m, 1 H, EtOOCCH); 3.71 (m, 1 H, PhCH); 3.88 (q, *J* = 7.1 Hz, 2 H, OCH2); 3.92 (d, *J* = 9.3 Hz, 1 H, (EtOOC)2CH); 3.94-4.11 (m, 4 H, 2 OCH2); 5.98 (ddd, *J* = 15.7, 7.4, 6.8 Hz, 1 H, =CH); 6.22 (d, *J* = 15.8 Hz, 1 H, =CHPh); 7.03-7.29 (m, 10 H, Ph). - 13C NMR (100 MHz): = 13.7 (q, OCH2*C*H3), 13.9 (q, OCH2*C*H3), 14.2 (q, OCH2*C*H3), 33.0 (t, =CH*C*H2), 46.7, 49.0 (2 d, PhCH, EtOOC*C*H), 55.8 (d, (EtOOC)2*C*H), 60.6 (t, OCH2), 61.19 (t, OCH2), 61.6 (t, OCH2), 126.0 (d), 127.8 (d), 128.1 (d), 128.2 (d), 128.39 (d), 128.7 (d), 129.1 (d), 132.1 (d), 137.3 (s, Ph), 137.9 (s, Ph), 167.5 (s, COOEt), 168.0 (s, COOEt), 173.4 (s, COOEt). - MS, *m/z* (%): 452 (M+, 17), 407 (14), 378 (34), 361 (17), 332 (24), 304 (15), 287 (13), 250 (100), 219 (46), 203 (87), 176 (29), 157 (49), 131 (43), 117 (58), 103 (24), 91 (52), 77 (14). - C27H32O6(452.55): calcd. C 71.66 H 7.13; found C 71.56 H 7.17.

*anti/syn-***Diethyl 2-[2-(Methoxycarbonyl)-5-methyl-1-phenylhex-4-en-1-yl]malonate 3da**:

Colorless oil. - IR (film): 3063, 3031, 2952, 2935, 1736, 1454, 1370, 1302, 1256, 1247, 1201, 1174, 1157, 1097. - *anti*-**3da**:1H NMR (400 MHz):  = 0.85 (t, *J* = 7.1 Hz, 3 H, OCH2C*H3*); 1.25 (t, *J* = 7.1 Hz, 3 H, OCH2C*H3*); 1.50 (s, 3 H, =CCH3); 1.65 (s, 3 H, =CCH3); 2.05 (m, *2J* = 14.6 Hz, 1 H, =CHC*H*2); 2.17 (m, *2J* = 14.6 Hz, 1 H, =CHC*H*2); 2.93 (ddd, *J* = 8.3, 6.8, 5.1 Hz, 1 H, CHCOOMe); 3.54 (s, 3 H, OCH3); 3.67 (dd, *J* = 11.3, 5.1 Hz, 1 H, CHPh); 3.81 (q, *J* = 7.1 Hz, 1 H, OC*H*2); 3.82 (q, *J* = 7.1 Hz, 1 H, OC*H*2); 4.12 (d, *J* = 11.3 Hz, 1 H, CH(COOEt)2); 4.200 (q, *J* = 7.1 Hz, 1 H, OC*H*2); 4.205 (q, *J* = 7.1 Hz, 1 H, OC*H*2); 5.05 (ddt, *J* = 7.6, 6.3, 1.3 Hz, 1 H, =CH); 7.06 (m, 2 H, Ph); 7.18 (m, 3 H, Ph). - 13C NMR (100 MHz):  = 13.5 (q, OCH2*C*H3), 14.0 (q, OCH2*C*H3), 17.8 (q, (*Z*)-=C*C*H3), 25.7 (q, (*E*)-=C*C*H3), 28.4 (t, H2*C*CH=), 46.6, 47.9 (2 d, PhCH, OOC*C*H), 51.2 (q, OCH3), 55.4 (d, CH(COOEt)2), 61.1 (t, OCH2), 61.6 (t, OCH2), 121.0 (d, =CH), 127.3 (d, *p*-Ph), 127.9 (d, Ph), 129.0 (d, Ph), 133.9 (s, =*C*(CH3)2), 137.2 (s, Ph), 167.7 (s, COOEt), 168.2 (s, COOEt), 173.5 (s, COOMe). - *syn*-**3da**: 1H NMR (400 MHz):  = 0.90 (t, *J* = 7.1 Hz, 3 H, OCH2C*H3*); 1.16 (t, *J* = 7.1 Hz, 3 H, OCH2C*H3*); 1.34 (s, 3 H, =CCH3); 1.54 (s, 3 H, =CCH3); 1.88 (m, 1 H, =CHC*H*2); 2.03 (m, 1 H, =CHC*H*2); 2.83 (ddd, *J* = 10.3, 8.8, 3.8 Hz, 1 H, CHCOOMe); 3.58 (s, 3 H, OCH3); 3.71 (dd, *J* = 9.3, 8.8 Hz, 1 H, CHPh); 3.82 (q, *J* = 7.2 Hz, 2 H, OC*H*2); 3.84 (d, *J* = 9.3 Hz, 1 H, CH(COOEt)2); 4.07 (q, *J* = 7.2 Hz, 2 H, OC*H*2); 4.87 (t, *J* = 7.2 Hz, 1 H, =CH); 7.16 (m, 5 H, Ph). - 13C NMR (100 MHz):  = 13.6 (q, OCH2*C*H3), 13.9 (q, OCH2*C*H3), 17.5 (q, (*Z*)-=C*C*H3), 25.6 (q, (*E*)-=C*C*H3), 28.1 (t, H2*C*CH=), 46.7, 49.3 (2 d, PhCH, OOC*C*H), 51.5 (q, OCH3), 56.0 (d, CH(COOEt)2), 61.1 (t, OCH2), 61.5 (t, OCH2), 120.6 (d, =CH), 127.3 (d, *p*-Ph), 128.1 (d, Ph), 129.1 (d, Ph), 133.8 (s, =*C*(CH3)2), 138.1 (s, Ph), 167.5 (s, COOEt), 168.0 (s, COOEt), 174.3 (s, COOMe). - MS, *m/z* (%): 390 (M+, 4), 359 (4), 345 (8), 330 (39), 313 (9), 299 (13), 284 (8), 256 (24), 250 (100), 176 (40), 171 (54), 141 (43), 131 (55), 109 (31), 103 (24), 81 (15), 69 (14). - C22H30O6 (390.48): calcd. C 67.67 H 7.74; found *anti*: C 67.47 H 7.85, *syn*: C 67.72 H 7.85.

*anti/syn-***Diethyl 2-[2-(*tert*-Butyloxycarbonyl)-5-methyl-1-phenylhex-4-en-1-yl]malonate 3ea**:

Colorless oil. - IR (film): 3090, 3064, 3033, 2980, 2933, 2878, 1754, 1733, 1455, 1392, 1368, 1257, 1249, 1217, 1174, 1148, 1032, 701. - *anti*-**3ea**:1H NMR (200 MHz):  = 0.88 (t, *J* = 7.1 Hz, 3 H, OCH2C*H3*); 1.23 (t, *J* = 7.1 Hz, 3 H, OCH2C*H3*); 1.25 (s, 9 H, OC(CH3)3); 1.51 (s, 3 H, =CCH3); 1.64 (s, 3 H, =CCH3); 1.94-2.21 (m, 2 H, =CHC*H*2); 2.86 (m, 1 H, CHCO2); 3.62 (dd, *J* = 10.2, 6.9 Hz, 1 H, CHPh); 3.83 (q, *J* = 7.1 Hz, 2 H, OC*H*2); 4.02 (d, *J* = 10.2 Hz, 1 H, CH(COOEt)2); 4.17 (q, *J* = 7.1 Hz, 1 H, OC*H*2); 4.18 (q, *J* = 7.2 Hz, 1 H, OC*H*2); 5.05 (t, *J* = 7.1 Hz, 1 H, =CH); 7.18 (m, 5 H, Ph). - 13C NMR (50 MHz):  = 13.6 (q, OCH2*C*H3), 14.0 (q, OCH2*C*H3), 17.8 (q, (*Z*)-=C*C*H3), 25.71 (q, (*E*)-=C*C*H3), 27.8 (q, OC(*C*H3)3), 29.2 (t, H2*C*CH=), 46.9, 49.1 (2 d, PhCH, OOC*C*H), 55.6 (d, CH(COOEt)2), 61.1 (t, OCH2), 61.5 (t, OCH2), 80.4 (s, O*C*(CH3)3), 121.2 (d, =CH), 127.2 (d, *p*-Ph), 127.7 (d, Ph), 129.6 (d, Ph), 133.4 (s, =*C*(CH3)2), 137.6 (s, Ph), 167.8 (s, COOEt), 168.3 (s, COOEt), 172.4 (s, COO*t*Bu). - *syn*-**3ea**: 1H NMR (200 MHz):  = 1.00 (t, *J* = 7.1 Hz, 3 H, OCH2C*H3*); 1.14 (t, *J* = 7.1 Hz, 3 H, OCH2C*H3*); 1.37 (s, 9 H, OC(CH3)3); 1.39 (s, 3 H, =CCH3); 1.58 (s, 3 H, =CCH3); 1.94-2.21 (m, 2 H, =CHC*H*2); 2.86 (m, 1 H, CHCOO); 3.67 (m, 1 H, CHPh); 3.88 (d, *J* = 8.2 Hz, 1 H, CH(COOEt)2); 3.92 (q, *J* = 7.2 Hz, 2 H, OC*H*2); 4.06 (m, 2 H, OC*H*2); 4.95 (m, 1 H, =CH); 7.18 (m, 5 H, Ph). - 13C NMR (50 MHz):  = 13.7 (q, OCH2*C*H3), 13.9 (q, OCH2*C*H3), 17.6 (q, (*Z*)-=C*C*H3), 25.67 (q, (*E*)-=C*C*H3), 27.9 (q, OC(*C*H3)3), 28.8 (t, H2*C*CH=), 46.7, 49.5 (2 d, PhCH, OOC*C*H), 55.4 (d, CH(COOEt)2), 61.0 (t, OCH2), 61.3 (t, OCH2), 80.6 (s, O*C*(CH3)3), 121.0 (d, =CH), 127.2 (d, Ph), 127.9 (d, Ph), 129.6 (d, Ph), 133.1 (s, =*C*(CH3)2), 138.0 (s, Ph), 167.7 (s, COOEt), 168.1 (s, COOEt), 173.4 (s, COO*t*Bu). - MS, *m/z* (%): 432 (M+, 5), 376 (20), 359 (7), 330 (29), 284 (7), 250 (100), 203 (9), 176 (31), 171 (23), 131 (23), 91 (6), 57 (19). - C25H36O6 (432.55): calcd. C 69.42 H 8.39; found C 69.31 H 8.53.

*anti/syn-***Diethyl 2-[2-(*tert*-Butyloxycarbonyl)-1,5-dimethylhex-4-en-1-yl]malonate 3eb**:

Colorless liquid. - IR (film): 2980, 2952, 2935, 1754, 1732, 1456, 1392, 1368, 1302, 1251, 1223, 1215, 1176, 1150, 1032, 849. - *anti*-**3eb**:1H NMR (200 MHz):  = 0.95 (d, *J* = 6.7 Hz, 3 H, CHC*H3*); 1.24 (t, *J* = 7.1 Hz, 6 H, OCH2C*H3*); 1.40 (s, 9 H, OC(C*H*3)3); 1.58 (s, 3 H, =CCH3); 1.64 (s, 3 H, =CCH3); 2.10-2.54 (m, 4 H, =CHC*H*2, C*H*CH3, C*H*COO); 3.50 (d, *J* = 8.4 Hz, 1 H, C*H*(COOEt)2); 4.16 (q, *J* = 7.1 Hz, 4 H, OC*H*2); 5.03 (m, 1 H, =CH). - 13C NMR (50 MHz):  = 13.3 (q, CH*C*H3), 14.04 (q, OCH2*C*H3), 17.7 (q, (*Z*)-=C*C*H3), 25.7 (q, (*E*)-=C*C*H3), 28.0 (q, OC(*C*H3)3), 28.9 (t, H2*C*CH=), 34.96 (d, *C*HCH3), 48.6 (d, *C*HCOO), 55.4 (d, *C*H(COOEt)2), 61.16 (t, OCH2), 61.22 (t, OCH2), 80.5 (s, O*C*(CH3)3), 121.1 (d, =CH), 133.4 (s, =*C*(CH3)2), 168.53 (s, COOEt), 168.55 (s, COOEt), 173.1 (s, COO*t*Bu). - *syn*-**3eb**: 1H NMR (200 MHz):  = 1.02 (d, *J* = 6.9 Hz, 3 H, CHC*H3*); 1.25 (t, *J* = 7.1 Hz, 6 H, OCH2C*H3*); 1.39 (s, 9 H, OC(C*H*3)3); 1.58 (s, 3 H, =CCH3); 1.64 (s, 3 H, =CCH3); 2.10-2.54 (m, 4 H, =CHC*H*2, C*H*CH3, C*H*COO); 3.42 (d, *J* = 6.4 Hz, 1 H, C*H*(COOEt)2); 4.17 (q, *J* = 7.2 Hz, 4 H, OC*H*2); 5.03 (m, 1 H, =CH). - 13C NMR (50 MHz):  = 13.4 (q, CH*C*H3), 13.96 (q, OCH2*C*H3), 17.7 (q, (*Z*)-=C*C*H3), 25.7 (q, (*E*)-=C*C*H3), 27.2 (t, H2*C*CH=), 27.9 (q, OC(*C*H3)3), 35.00 (d, *C*HCH3), 49.3 (d, *C*HCOO), 54.8 (d, *C*H(COOEt)2), 61.0 (t, OCH2), 61.22 (t, OCH2), 80.3 (s, O*C*(CH3)3), 121.2 (d, =CH), 133.2 (s, =*C*(CH3)2), 168.3 (s, COOEt), 168.7 (s, COOEt), 173.9 (s, COO*t*Bu). - MS, *m/z* (%): 370 (M+, 0.5), 314 (13), 297 (8), 268 (100), 251 (17), 222 (14), 194 (69), 187 (14), 121 (34), 109 (27), 69 (7), 57 (35). - HRMS (M+): calcd. 368.2199; found 368.21882. - C20H34O6 (370.48): calcd. C 64.84 H 9.25; found C 64.83 H 9.56.

**Tandem Michael Addition/Radical 5-*exo* Cyclization of 1a-d and 2a,c induced by 5 in the presence of TEMPO 6 (General Procedure):**

To a solution of 209 l (1.6 mmol) *i*-Pr2NH in 10 ml dry THF was added 1.0 ml (1.6 mmol) BuLi (1.6*M* in hexane) at -78oC under N2. After stirring for 30 min, 2.53 ml dry HMPA was added via syringe, followed by a solution of 1.2 mmol esters **1a-d** in 0.5 ml dry THF (The color of the solution turned reproducibly dark brown on addition of **1b,c**, fading to yellow/pale brown during 30 min; final concentration 75 m*M*). The reaction mixture was stirred for 30 min at -78oC and 1 mmol of **2a** or **c** was added. The yellow turbid reaction mixture was stirred at -78oC for 30 min and then slowly warmed to a maximum temperature of 0oC until the reaction was complete by tlc (ca. 1.5 h). A thoroughly homogenized solid mixture of 203 mg (1.3 mmol) **6** and 397 mg (1.2 mmol) **5** was added in small portions at -40oC. The ferrocenium salt was consumed quickly, and the orange solution was treated subsequently with further portions of **5** until the mixture remained green-blue (total: ca. 700 mg **5**). Stirring at -40oC was continued for 1 h. The reaction mixture was quenched with 4 drops of water, stirred for 5 min, diluted with ether to the double volume and filtered through a plug of silica gel. The solvent was evaporated and the inhomogeneous residue was preadsorbed on silica gel and purified by column chromatography (silica gel, hexane/EtOAc 50:1 gradient to 1:1) to give >95% ferrocene, followed by excess **1**, (**10**), **7/8/9**, excess **6**. Compounds **7aa** and **7ac** are more polar than TEMPO **6**. For **7ba/8ba, 7ca/8ca, and 7cc/8cc/9cc**, some of the product coelutes with **6**. The latter was, however, easily removed by evaporation in vacuum at 40oC/0.1 mbar. Compounds **7da/8da** are less polar than TEMPO **6**.

**Recycling of 5**:

Ferrocene, collected from the oxidative cyclizations was recrystallized from MeOH or *n*-hexane. Reoxidation was performed by adding 5.58 g (30 mmol) ferrocene to 10.2 ml concentrated H2SO4 and stirring for 45 min. The blue-black reaction mixture was slowly added to a solution of 5 g *t*-BuOH in 168 ml H2O, stirred for 15 min and filtered from some insoluble material. At 0°C, 11 g (60 mmol) KPF6 dissolved in 234 ml H2O was added to the filtrate and stirred for 60 min at 0°C. The blue precipitate was filtered, washed twice with 40 ml icecold water, 50 ml EtOH and then with ether until the ether remained colorless. Drying for 12 h in vacuum yielded 8.46 g (85%) **2** as a blue powder.

*(2S*,3S*,5R*)-***Diethyl 3-(Methoxycarbonyl)-2-phenyl-5-[(2,2,6,6-tetramethylpiperidin-1-yloxy)methyl]cyclopentane-1,1-dicarboxylate 7aa**: Colorless needles. - mp. 91-92oC (from pentane). - IR (KBr): 3033, 3001, 2992, 2977, 2940, 1740, 1725, 1459, 1365, 1275, 1252, 1194, 1169, 1033, 704. - 1H NMR (400 MHz):  = 0.70 (t, *J* = 7.1 Hz, 3 H, OCH2C*H3*); 1.06 (s, 3 H, NCCH3); 1.08 (s, 6 H, NCCH3); 1.15 (s, 3 H, NCCH3); 1.19 (t, *J* = 7.1 Hz, 3 H, OCH2C*H3*); 1.27 (m, 1 H, Piperidine-H4); 1.42 (m, 5 H, piperidine-H3-H5); 1.88 (dt, *J* = 12.7, 10.9 Hz, 1 H, -H4); 2.60 (ddd, *J* = 12.7, 7.4, 5.6 Hz, 1 H, -H4); 3.15 (m, 2 H, H3, H5); 3.34 (dq, *J* = 10.7, 7.1 Hz, 1 H, OCH2); 3.45 (dd, *J* = 10.3, 8.5 Hz, 1 H, CH2ON); 3.58 (s, 3 H, OCH3); 3.70 (dq, *J* = 10.7, 7.1 Hz, 1 H, OCH2); 3.95 (dd, *J* = 8.5, 3.7 Hz, 1 H, CH2ON); 4.09 (dq, *J* = 10.7, 7.1 Hz, 1 H, OCH2); 4.21 (dq, *J* = 10.7, 7.1 Hz, 1 H, OCH2); 4.38 (d, *J* = 8.9 Hz, 1 H, H2); 7.17 (m, 5 H, Ph). - 13C NMR (100 MHz):  = 13.2 (q, OCH2*C*H3), 14.0 (q, OCH2*C*H3), 17.0 (t, piperidine-C4), 19.97 (q, NC*C*H3), 20.03 (q, NC*C*H3), 32.9 (q, NC*C*H3), 33.0 (t, C4), 33.2 (q, NC*C*H3), 39.6 (t, piperidine-C3,C5), 44.8 (d, C5), 50.0 (d, C3), 51.8 (q, OCH3), 53.6 (d, C2), 59.69 (s, NC), 59.73 (s, NC), 60.8 (t, OCH2), 61.4 (t, OCH2), 66.7 (s, C1), 77.3 (t, CH2ON), 127.0 (d, *p*-Ph), 128.0, 128.7 (2 d, *o*-, *m*-Ph), 140.5 (s, *i*-Ph), 169.5 (s, COOEt), 170.1 (s, COOEt), 174.1 (s, COOMe). - MS (CI, NH3, pos.), *m/z* (%): 517 (M++H+, 100), 361 (23), 142 (5). - C29H43NO7 (517.66): calcd. C 67.29 H 8.37 N 2.71; found C 67.31 H 8.52 N 2.52.

**Methyl 2-Allyl-5-oxo-3,5-diphenyl-4-(2,2,6,6-tetramethylpiperidin-1-yloxy)pentanoate 10ac**: Colorless oil as a partly separable mixture of four diastereomers (configuration not assigned): - IR (film): 3064, 3028, 3004, 2976, 2934, 2872, 2849, 1737, 1688, 1665, 1598, 1448, 1363, 1241, 1197, 1167, 1134, 914, 762, 733, 701. - **1st diastereomer**: 1H NMR (400 MHz):  = 0.67 (s, 3 H, NCCH3); 1.00 (s, 3 H, NCCH3); 1.04 (s, 3 H, NCCH3); 1.05-1.45 (m, 6 H, piperidine-H3-H5); 1.40 (s, 3 H, NCCH3); 2.38 (ddd, *J* = 14.6, 11.1, 7.6 Hz, 1 H, =CHC*H*2); 3.16 (m, 2 H, =CHC*H*2, CHCOO); 3.22 (s, 3 H, OCH3); 3.79 (dd, *J*= 9.7, 4.7 Hz, 1 H, PhC*H*); 4.95 (dd, *J* = 10.0, 1.7 Hz, 1 H, =CH2); 5.03 (d, *J* = 16.8 Hz, 1 H, =CH2); 5.51 (d, *J* = 4.8 Hz, 1 H, CHON); 5.79 (m, 1 H, =CH); 6.99 (m, 5 H, *Ph*CH); 7.14 (m, 2 H, *m*-PhCO); 7.29 (m, 1 H, *p*-PhCO); 7.52 (d, *J* = 7.3 Hz, 2 H, *o*-PhCO). - 13C NMR (100 MHz):  = 16.7 (t, piperidine-C4), 20.0 (q, NC*C*H3), 20.2 (q, NC*C*H3), 33.7 (q, NC*C*H3), 34.0 (q, NC*C*H3), 35.73 (t, =CH*C*H2), 40.0 (t, piperidine-C3,C5), 40.2 (t, piperidine-C3,C5), 46.6 (d, *C*HCOO), 50.2 (d, CHPh), 50.6 (q, OCH3), 59.2 (s, NC), 60.5 (s, NC), 85.8 (d, CHON), 115.9 (t, =CH2), 126.7 (d, *p*-PhCH), 127.4 (d, PhCH), 127.7 (d, *m*-PhCO), 128.1 (d, *o*-PhCO), 129.2 (d, PhCH), 132.2 (d, *p*-PhCO), 136.0 (s+d, 2 C, *i*-PhCH, =CH), 138.2 (s, *i*-PhCO), 174.5 (s, COO), 201.96 (s, Ph*C*O). - **2nd diastereomer**: 1H NMR (400 MHz):  = 0.73 (br. s, 3 H, NCCH3); 0.83 (br. s, 3 H, NCCH3); 1.05-1.45 (m, 6 H, piperidine-H3-H5); 1.23 (br. s, 3 H, NCCH3); 1.55 (br. s, 3 H, NCCH3); 2.46 (dt, *J* = 14.0, 8.5 Hz, 1 H, =CHC*H*2); 2.75 (br. s, 1 H, =CHC*H*2); 3.22 (s, 3 H, OCH3); 3.26 (dt, *J* = 9.2, 5.0 Hz, 1 H, CHCOO); 3.72 (very br. s, 1 H, PhC*H*); 5.00 (d, *J* = 9.5 Hz, 1 H, =CH2); 5.07 (d, *J* = 16.0 Hz, 1 H, =CH2); 5.44 (very br. s, 1 H, CHON); 5.79 (m, 1 H, =CH); 6.99 (m, 5 H, *Ph*CH); 7.14 (br. m, 2 H, *m*-PhCO); 7.29 (br. m, 1 H, *p*-PhCO); 7.47 (br. m, 2 H, *o*-PhCO). - 13C NMR (100 MHz):  = 16.7 (t, piperidine-C4), 20.0 (br. q, NC*C*H3), 20.7 (br. q, NC*C*H3), 33.4 (br. q, NC*C*H3), 34.9 (br. q, NC*C*H3), 35.66 (t, =CH*C*H2), 40.3 (br. t, piperidine-C3,C5), 40.6 (br. t, piperidine-C3,C5), 46.9 (d, *C*HCOO), 49.8 (d, CHPh), 50.5 (q, OCH3), 60.2 (br. s, NC), 60.8 (br. s, NC), 85.8 (d, CHON), 116.8 (t, =CH2), 126.6 (d, *p*-PhCH), 127.3 (br. d, *m*-PhCO), 127.7 (d, PhCH), 128.4 (d, PhCH), 128.9 (br. d, *o*-PhCO), 131.8 (d, *p*-PhCO), 135.0 (d, =CH), 137.6 (s, *i*-PhCH), 138.6 (s, *i*-PhCO), 173.8 (s, COO), 201.5 (s, Ph*C*O). - **3rd diastereomer**: 1H NMR (400 MHz):  = 0.67 (s, 3 H, NCCH3); 0.98 (br. s, 3 H, NCCH3); 1.05-1.45 (m, 6 H, piperidine-H3-H5); 1.09 (br. s, 3 H, NCCH3); 1.38 (br. s, 3 H, NCCH3); 1.92 (ddd, *J* = 13.8, 10.8, 8.6 Hz, 1 H, =CHC*H*2); 2.03 (ddd, *J* = 13.8, 5.5, 4.0 Hz, 1 H, =CHC*H*2); 3.49 (dt, *J* = 10.9, 4.0 Hz, 1 H, CHCOO); 3.65 (s, 3 H, OCH3); 3.81 (m, 1 H, PhC*H*); 4.78 (d, *J* = 17.2 Hz, 1 H, =CH2); 4.82 (d, *J* = 10.1 Hz, 1 H, =CH2); 5.46 (d, *J* = 4.9 Hz, 1 H, CHON); 5.57 (m, 1 H, =CH); 6.99 (m, 5 H, *Ph*CH); 7.14 (m, 2 H, *m*-PhCO); 7.29 (m, 1 H, *p*-PhCO); 7.47 (m, 2 H, *o*-PhCO). - 13C NMR (100 MHz):  = 16.7 (t, piperidine-C4), 20.0 (q, NC*C*H3), 20.2 (q, NC*C*H3), 33.7 (q, NC*C*H3), 34.0 (q, NC*C*H3), 36.1 (t, =CH*C*H2), 39.3 (t, piperidine-C3,C5), 40.2 (t, piperidine-C3,C5), 43.5 (d, *C*HCOO), 50.1 (d, CHPh), 51.12 (q, OCH3), 59.7 (s, NC), 59.8 (s, NC), 83.6 (d, CHON), 116.4 (t, =CH2), 126.7 (d, *p*-PhCH), 127.9 (d, 3 C, *o*-, *m*-PhCO, PhCH), 129.2 (d, PhCH), 132.0 (d, *p*-PhCO), 134.6 (d, =CH), 136.7 (s, *i*-PhCH), 138.7 (s, *i*-PhCO), 175.1 (s, COO), 201.3 (s, Ph*C*O). - **4th diastereomer**: 1H NMR (400 MHz):  = 0.68 (br. s, 3 H, NCCH3); 0.76 (br. s, 3 H, NCCH3); 1.05-1.45 (m, 6 H, piperidine-H3-H5); 1.19 (br. s, 3 H, NCCH3); 1.51 (br. s, 3 H, NCCH3); 1.92 (m, 1 H, =CHC*H*2); 2.05 (m, 1 H, =CHC*H*2); 3.06 (dt, *J* = 10.1, 3.6 Hz, 1 H, CHCOO); 3.63 (s, 3 H, OCH3); 3.95 (dd, *J* = 10.4, 6.6 Hz, 1 H, PhC*H*); 4.77 (dd, *J* = 16.8, 1.1 Hz, 1 H, =CH2); 4.84 (d, *J* = 9.1 Hz, 1 H, =CH2); 5.19 (very br. s, 1 H, CHON); 5.57 (m, 1 H, =CH); 6.99 (m, 5 H, *Ph*CH); 7.14 (m, 2 H, *m*-PhCO); 7.28 (m, 1 H, *p*-PhCO); 7.48 (br. d, *J* = 7.0 Hz, 2 H, *o*-PhCO). - 13C NMR (100 MHz):  = 16.8 (t, piperidine-C4), 20.1 (br. q, NC*C*H3), 33.5 (q, NC*C*H3), 34.7 (q, NC*C*H3), 35.2 (t, =CH*C*H2), 40.2 (t, piperidine-C3,C5), 40.3 (t, piperidine-C3,C5), 45.8 (d, *C*HCOO), 49.0 (d, CHPh), 51.10 (q, OCH3), 60.1 (br. s, NC), 83.7 (d, CHON), 116.5 (t, =CH2), 126.8 (d, *p*-PhCH), 127.3 (d, PhCH), 127.8 (d,PhCO), 129.0 (d, PhCO), 129.7 (d, PhCH), 131.7 (d, *p*-PhCO), 134.4 (d, =CH), 136.8 (s, *i*-Ph), 138.3 (s, *i*-PhCO), 174.4 (s, COO), 202.03 (s, Ph*C*O). - MS, *m/z* (%): 477 (M+, 2), 321 (75), 289 (11), 156 (82), 105 (100), 77 (12). - HRMS *m/z*, M+ C30H39NO4: calcd. 477.2879; found: 477.2869  2.

*(1S*,2S*,3S*,4R*)-***Methyl 3-Benzoyl-2-phenyl-4-[(2,2,6,6-tetramethylpiperidin-1-yloxy)methyl]cyclopentanecarboxylate 7ac**: Pale yellow needles. - mp. 147-149oC (from ether). - IR (KBr): 3062, 3034, 2967, 2933, 1728, 1676, 1448, 1239, 1214, 1177, 1051, 714, 701, 695. -1H NMR (400 MHz):  = 0.60 (s, 3 H, NCCH3); 0.74 (s, 3 H, NCCH3); 0.84 (s, 3 H, NCCH3); 1.03 (s, 3 H, NCCH3); 1.14-1.39 (m, 6 H, piperidine-H3-H5); 1.92 (ddd, *J* = 13.2, 9.9, 7.3 Hz, 1 H, H4); 2.45 (ddd, *J* = 13.2, 8.2, 8.0 Hz, 1 H, H4); 3.00 (m, 2 H, H3, H5); 3.54 (dd, *J* = 8.9, 5.7 Hz, 1 H, CH2ON); 3.55 (s, 3 H, OCH3); 3.72 (dd, *J* = 9.1, 7.9 Hz, 1 H, CH2ON); 4.01 (m, 2 H, H1, H2); 7.09 (t, *J* = 7.1 Hz, 1 H, *p*-PhCH); 7.20 (m, 4 H, *o*-, *m*-PhCH); 7.33 (dd, *J* = 7.8, 7.3 Hz, 2 H, *m*-PhCO); 7.42 (t, *J* = 7.3 Hz, 1 H, *p*-PhCO); 7.84 (dd, *J* = 7.9, 1.3 Hz, 2 H, *o*-PhCO). - 13C NMR (100 MHz): = 17.0 (t, piperidine-C4), 19.8 (q, NC*C*H3), 32.8 (q, NC*C*H3), 34.2 (t, C4), 39.5 (t, piperidine-C3,C5), 42.0 (d, C5), 50.8 (d, C2), 50.9 (d, C3), 51.7 (q, OCH3), 55.8 (d, C1), 59.6 (s, N*C*CH3), 77.0 (t, CH2O), 126.7 (d, *p*-PhCH), 127.5 (d, PhCH), 128.3 (d, 2 C, *o*- and *m*-PhCO), 128.5 (d, PhCH), 132.7 (d, *p*-PhCO), 137.7 (s, Ph), 141.4 (s, Ph), 174.6 (s, COO), 198.7 (s, Ph*C*O). - Some very minor resonances were detected, that may belong to another diastereomer: - 13C NMR (100 MHz):  = 17.0 (t, piperidine-C4), 19.8 (q, NC*C*H3), 32.8 (q, NC*C*H3), 33.0 (t, C4), 39.5 (t, piperidine-C3,C5), 43.2 (d, C3), 51.8 (q, OCH3) 54.7 (d, C5), 57.6 (d, C1), 59.8 (s, N*C*CH3), 78.8 (t, CH2O), 126.9 (d, *p*-PhCH), 127.3 (d, Ph), 128.3 (d, Ph), 128.6 (d, Ph), 132.6 (d, *p*-PhCO). - MS (CI, NH3, pos.), *m/z* (%): 478 (M++H+, 100), 321 (37), 158 (7), 142 (16). - C30H39NO4 (477.64): calcd. C 75.44 H 8.23 N 2.93; found C 75.14 H 8.23 N 2.68.

*(2S*,3S*,5R*)-***Triethyl 2-Phenyl-5-[*(S*)-*phenyl-(2,2,6,6-tetramethylpiperidin-1-yloxy)methyl]cyclopentane-1,1,3-tricarboxylate 5-*(R,S)*-7ba,**

*(2S*,3S*,5R*)-***Triethyl 2-Phenyl-5-[*(R*)*-phenyl-(2,2,6,6-tetramethylpiperidin-1-yloxy)methyl]cyclopentane-1,1,3-tricarboxylate 5-*(R,R)*-7ba,**

*(2S*,3S*,5S*)-***Triethyl 2-Phenyl-5-[*(R*)*-phenyl-(2,2,6,6-tetramethylpiperidin-1-yloxy)methyl]cyclopentane-1,1,3-tricarboxylate 5-*(S,R)*-8ba**: Flash Chromatography gave an inseparable mixture of 5-*(R,S)*-**7ba**, 5-*(R,R)*-**7ba**, and 5-*(S,R)*-**8ba** as a pale pink thick oil, from which 5-*(R,S)*-**7ba** slowly crystallized. - IR (film): 3064, 3034, 2979, 2935, 2872, 1733, 1457, 1376, 1259, 1200, 1033, 912, 734, 699.

5-*(R,S)*-**7ba**: 1H NMR (400 MHz):  = -0.11 (br. s,3 H, NCCH3); 0.57 (t, *J* = 7.1 Hz, 3 H, -OCH2C*H3*); 0.83 (t, *J* = 7.1 Hz, 3 H, -OCH2C*H3*); 0.89 (br. s,3 H, NCCH3); 1.06 (t, *J* = 7.1 Hz, 3 H, CHCO2CH2C*H3*); 1.05-1.22 (m,5 H, piperidine-H3-H5); 1.18 (br. s, 3 H, NCCH3); 1.37 (br. s, 3 H, NCCH3); 1.42 (m, 1 H, piperidine-H3); 2.37 (dt, *J* = 12.1, 10.6 Hz, 1 H, -H4); 2.79 (ddd, *J* = 13.0, 6.7, 6.3 Hz, 1 H, -H4); 3.14 (dq, *J* = 10.6, 7.2 Hz, 1 H, -OCH2); 3.23 (dt, *J* = 12.0, 6.5 Hz, 1 H, H3); 3.36 (dq, *J* = 10.7, 7.1 Hz, 1 H, -OCH2); 3.60 (dq, *J* = 10.6, 7.1 Hz, 1 H, -OCH2); 3.99 (m, 4 H, OCH2, H5); 4.52 (d, *J* = 12.3 Hz, 1 H, H2); 4.74 (d, *J* = 10.3 Hz, 1 H, CHON); 7.14 (m, 8 H, Ph); 7.32 (m, 2 H, Ph). - 13C NMR (100 MHz):  = 12.9, 13.2, 13.8 (3 q, 3 OCH2*C*H3), 17.0 (t, piperidine-C4), 20.4, 20.9 (2 br. q, 2 NC*C*H3), 32.2 (br. q, NC*C*H3), 34.2 (t, C4), 35.2 (br. q, NC*C*H3), 39.9, 40.9 (2 br. t, piperidine-C3,C5), 46.8, 47.2 (2 d, C3, C5), 55.9 (d, C2), 58.5 (s, NC), 60.2, 60.57, 60.7 (3 t, 3 OCH2), 61.0 (s, NC), 66.8 (s, C1), 84.0 (d, CHON), 126.5 (d, Ph), 126.7 (d, *p*-Ph), 127.52 (d, Ph), 127.54 (d, Ph), 128.44 (d, Ph), 131.1 (d, Ph), 137.9 (s, Ph), 139.1 (s, Ph), 169.80 (s, COO), 169.9 (s, COO), 173.3 (s, COO).

5-*(R,R)*-**7ba** (Detectable resonances): 1H NMR (400 MHz):  = 0.59 (t, *J* = 7.4 Hz, 3 H, OCH2C*H3*); 0.75 (t, *J* = 7.1 Hz, 3 H, OCH2C*H3*); 1.03 (t, *J* = 7.1 Hz, 3 H, OCH2C*H3*); 2.74 (m, 1 H, H4); 2.97 (m, 2 H, OCH2, H4); 3.45 (m, 1 H, OCH2) 3.68 (m, 2 H, OCH2); 4.00 (m, 2H, H3, H5); 4.17 (d+m, *J* = 11.3 Hz, 2 H, H2, OCH2); 4.86 (d, *J* = 8.9 Hz, 1 H, CHON). - 13C NMR (100 MHz):  = 13.4 (q, OCH2*C*H3), 29.6 (t, C4), 46.7, 47.5 (2 d, C3, C5), 59.9, 60.3 (2 t, 2 OCH2), 68.8 (s, C1), 126.2, (d, Ph), 127.4 (d, Ph), 129.1 (d, Ph), 129.3 (d, Ph), 131.8 (d, Ph), 168.6 (s, COO), 172.7 (s, COO).

5-*(S,R)*-**8ba**: 1H NMR (400 MHz):  = 0.00 (br. s,3 H, NCCH3); 0.77 (t, *J* = 7.1 Hz, 6 H, 2 OCH2C*H3*); 1.05-1.45 (m,6 H, piperidine-H3-H5); 1.09 (t, *J* = 7.0 Hz, 3 H, OCH2C*H3*); 1.11 (br. s,3 H, NCCH3); 1.22 (br. s, 3 H, NCCH3); 1.44 (br. s, 3 H, NCCH3); 2.55 (ddd, *J* = 13.6, 9.4, 5.4 Hz, 1 H, -H4); 2.97 (m, 2 H, OCH2, -H4); 3.42 (m, 1 H, H5); 3.49 (ddd, *J* = 11.9, 117, 5.4 Hz, 1 H, H3); 3.61 (m, 2 H, OCH2); 3.88 (dq, *J* = 10.7, 7.1 Hz, 1 H, OCH2); 4.00 (m, 2H, OCH2); 4.36 (d, *J* = 11.7 Hz, 1 H, H2); 5.26 (d, *J* = 10.3 Hz, 1 H, CHON); 7.15-7.34 (m, 10 H, Ph). - 13C NMR (100 MHz):  = 13.1, 13.3, 13.9 (3 q, 3 OCH2*C*H3), 17.0 (t, piperidine-C4), 20.4, 20.9 (2 br. q, 2 NC*C*H3), 32.0 (t, C4), 32.2, 35.2 (2 br. q, 2 NC*C*H3), 39.9, 40.9 (2 br. t, piperidine-C3,C5), 44.4 (d, C5), 51.0 (d, C3), 56.9 (d, C2), 58.4 (s, NC), 60.1, 60.4, 60.63 (3 t, 3 OCH2), 61.1 (s, NC), 67.3 (s, C1), 83.0 (d, CHON), 126.8 (d, Ph), 126.9 (d, *p*-Ph), 127.47 (d, Ph), 127.58 (d, Ph), 128.41 (d, Ph), 130.9 (d, Ph), 137.1 (s, Ph), 139.6 (s, Ph), 168.5 (s, COO), 169.82 (s, COO), 175.1 (s, COO). - MS (CI, NH3, pos.), *m/z* (%): 608 (2, M++H+), 470 (3), 453 (2), 378 (1), 314 (2), 174 (100, TEMPO+NH4+), 157 (68). - C36H49NO7 (607.79): calcd. C 71.14 H 8.13 N 2.30; found: C 70.80 H 8.61 N 2.07.

*(2S*,3S*,5R*)-***Diethyl 3-(*tert*-Butyloxycarbonyl)-2-phenyl-5-[*(S*)*-phenyl-(2,2,6,6-tetramethylpiperidin-1-yloxy)methyl]cyclopentane-1,1-dicarboxylate 5-*(R,S)*-7ca,**

*(2S*,3S*,5R*)-***Diethyl 3-(*tert*-Butyloxycarbonyl)-2-phenyl-5-[*(R*)*-phenyl-(2,2,6,6-tetramethylpiperidin-1-yloxy)methyl]cyclopentane-1,1-dicarboxylate 5-*(R,R)*-7ca,**

*(2S*,3S*,5S*)-***Diethyl 3-(*tert*-Butyloxycarbonyl)-2-phenyl-5-[*(R*)*-phenyl-(2,2,6,6-tetramethylpiperidin-1-yloxy)methyl]cyclopentane-1,1-dicarboxylate 5-*(S,R)*-8ca**: Flash Chromatography gave an inseparable mixture of 5-*(R,S)*-**7ca**, 5-*(R,R)*-**7ca**, and 5-*(S,R)*-**8ca** as a pale pink thick oil, from which 5-*(R,S)*-**7ca** slowly crystallized.

5-*(R,S)*-**7ca**: mp. 126-128oC (from hexane/ether 3:1). - IR (KBr): 3062, 3034, 2997, 2985, 2978, 2932, 2902, 1736, 1720, 1712, 1459, 1368, 1285, 1264, 1207, 1153, 699. - 1H NMR (400 MHz):  = -0.14 (br. s,3 H, NCCH3); 0.54 (t, *J* = 7.1 Hz, 3 H, -OCH2C*H3*); 0.78 (t, *J* = 7.1 Hz, 3 H, -OCH2C*H3*); 0.87 (br. s,3 H, NCCH3); 1.05-1.44 (m,6 H, piperidine-H3, H4, H5); 1.17 (br. s, 3 H, NCCH3); 1.18 (s, 9 H, OC(C*H3*)3); 1.36 (br. s, 3 H, NCCH3); 2.32 (q, *J* = 11.8 Hz, 1 H, -H4); 2.70 (ddd, *J* = 13.0, 6.7, 6.3 Hz, 1 H, -H4); 3.09 (dt, *J* = 12.2, 6.5 Hz, 1 H, H3); 3.15 (dq, *J* = 10.6, 7.2 Hz, 1 H, -OCH2); 3.27 (dq, *J* = 10.7, 7.1 Hz, 1 H, -OCH2); 3.60 (dq, *J* = 10.6, 7.1 Hz, 1 H, -OCH2); 3.93 (m, 2 H, -OCH2, H5); 4.37 (d, *J* = 12.4 Hz, 1 H, H2); 4.71 (d, *J* = 10.4 Hz, 1 H, CHON); 7.11 (m, 8 H, Ph); 7.29 (m, 2 H, Ph). - 13C NMR (100 MHz):  = 12.9 (q, OCH2*C*H3), 13.2 (q, OCH2*C*H3), 17.0 (t, piperidine-C4), 20.5 (br. q, NC*C*H3), 20.8 (br. q, NC*C*H3), 27.7 (q, OC(*C*H3)3), 32.1 (br. q, NC*C*H3), 33.9 (t, C4), 35.3 (br. q, NC*C*H3), 39.9 (br. t, piperidine-C3,C5), 40.9 (br. t, piperidine-C3,C5), 46.8, 47.6 (2 d, C3, C5), 56.3 (d, C2), 58.5 (s, NC), 60.5 (t, OCH2), 60.6 (t, OCH2), 60.9 (s, NC), 66.7 (s, C1), 80.1 (s, O*C*(CH3)3), 84.0 (d, CHON), 126.5 (d, Ph), 126.7 (d, *p*-Ph), 127.4 (d, Ph), 127.5 (d, *p*-Ph), 128.6 (d, Ph), 131.1 (d, Ph), 138.1 (s, Ph), 139.2 (s, Ph), 169.86 (s, COO), 169.92 (s, COO), 172.5 (s, COO).

5-*(R,R)*-**7ca** (Selected resonances): 1H NMR (400 MHz): = 0.60 (t, *J* = 7.1 Hz, 3 H, OCH2C*H3*); 1.36 (s,9 H, OC(C*H*3)3); 2.70 (m, 1 H, H4); 2.95 (m, 1 H, H4,); 3.09 (m, 1 H, OCH2); 3.37 (m, H, 1 OCH2); 3.73 (m, 1 H, OCH2); 3.94 (m, 2 H, H3, H5); 4.05 (d, *J* = 8.7 Hz, 1 H, H2); 4.84 (d, *J* = 8.9 Hz, 1 H, H6). - 13C NMR (100 MHz): = 13.1 (q, OCH2*C*H3), 14.0 (q, OCH2*C*H3), 27.3 (q, OC(*C*H3)3), 31.4 (t, C4), 46.5, 47.7 (2 d, C3, C5), 57.2 (d, C2), 79.8 (s, O*C*(CH3)3), 84.3 (d, CHON), 127.58, (d, Ph), 127.62 (d, Ph), 129.5 (d, Ph), 131.8 (d, Ph), 132.7 (d, Ph).

5-*(S,R)*-**8ca**: IR (film): 3064, 3034, 2978, 2933, 2872, 1728, 1457, 1367, 1259, 1202, 1153, 912, 734, 699. - 1H NMR (400 MHz):  = -0.04 (br. s,3 H, NCCH3); 0.744 (t, *J* = 7.0 Hz, 3 H, OCH2C*H3*); 0.746 (t, *J* = 7.0 Hz, 3 H, OCH2C*H3*); 0.75-1.45 (m,15 H, 3 NCCH3, piperidine-H3-H5); 1.21 (s,9 H, OC(C*H*3)3); 2.53 (ddd, *J* = 13.9, 9.5, 5.5 Hz, 1 H, -H4); 2.86 (q, *J* = 11.0 Hz, 1 H, -H4); 2.94 (dq, *J* = 10.6, 7.1 Hz, 1 H, -OCH2); 3.37 (m, 2 H, H3, H5); 3.59 (m, 2 H, - and -OCH2); 3.85 (dq, *J* = 10.7, 7.0 Hz, 1 H, -OCH2); 4.20 (d, *J* = 11.9 Hz, 1 H, H2); 5.24 (d, *J* = 10.3 Hz, 1 H, CHON); 7.10 (m, 10 H, Ph). - 13C NMR (100 MHz):  = 13.2 (q, OCH2*C*H3), 13.3 (q, OCH2*C*H3), 17.0 (t, piperidine-C4), 20.6 (br. q, NC*C*H3), 27.7 (q, OC(*C*H3)3), 31.4 (t, C4), 33.9 (br. q, NC*C*H3), 34.5 (br. q, NC*C*H3), 40.0 (br. t, piperidine-C3, C5), 40.9 (br. t, piperidine-C3,C5), 45.5 (d, C5), 51.1 (d, C3), 57.5 (d, C2), 59.9 (s, NC), 60.1 (t, OCH2), 60.3 (s, NC), 60.6 (t, OCH2), 67.4 (s, C1), 80.2 (s, O*C*(CH3)3), 83.0 (d, CHON), 126.77 (d, Ph), 126.80 (d, *p*-Ph), 127.3 (d, Ph), 128.7 (d, 2 C, Ph), 130.9 (d, Ph), 137.3 (s, Ph), 139.9 (s, Ph), 168.6 (s, COO), 169.9 (s, COO), 174.3 (s, COO). - MS (CI, NH3, pos.), *m/z* (%): 636 (89, M++H+), 479 (9), 423 (4), 330 (73), 174 (100, TEMPO+NH4+), 156 (68). - C38H53NO7 (635.83): calcd. C 71.78 H 8.40 N 2.20; found C 71.71 H 8.62 N 2.09.

*(1S*,2S*,3S*,4R*)-****tert*-Butyl 3-Benzoyl-2-phenyl-4-[*(S*)*-phenyl-(2,2,6,6-tetramethylpiperidin-1-yloxy)methyl]cyclopentanecarboxylate 4-*(R,S)*-7cc,**

*(1S*,2S*,3S*,4R*)-****tert*-Butyl 3-Benzoyl-2-phenyl-4-[*(R*)*-phenyl-(2,2,6,6-tetramethylpiperidin-1-yloxy)methyl]cyclopentanecarboxylate 4-*(R,R)*-7cc,**

*(1S*,2S*,3S*,4S*)-****tert*-Butyl 3-Benzoyl-2-phenyl-4-[*(R*)*-phenyl-(2,2,6,6-tetramethylpiperidin-1-yloxy)methyl]cyclopentanecarboxylate 4-*(S,R)*-8cc,**

*(1S*,2S*,3S*,4S*)-****tert*-Butyl 3-Benzoyl-2-phenyl-4-[*(S*)*-phenyl-(2,2,6,6-tetramethylpiperidin-1-yloxy)methyl]cyclopentanecarboxylate 4-*(S,S)*-8cc,**

*(1R*,2S*,3S*,4S*)-****tert*-Butyl 3-Benzoyl-2-phenyl-4-[*(R*)*-phenyl-(2,2,6,6-tetramethylpiperidin-1-yloxy)methyl]cyclopentanecarboxylate 4-*(S,R)*-9cc**: Flash chromatography gave a partly separable mixture of 4-*(R,S)*-**7cc**, 4-*(R,R)*-**7cc**, 4-*(S,R)*-**8cc**, 4-*(S,S)*-**8cc**, and 4-*(S,R)*-**9cc** as a colorless thick oil, from which the major component 4-*(R,S)*-**7cc** slowly crystallized. - mp. 136-137oC (from hexane). - IR (film): 3064, 3032, 3006, 2975, 2935, 2873, 1722, 1667, 1596, 1494, 1457, 1361, 1274, 1250, 1231, 1160, 957, 759, 700.

4-*(R,S)*-**7cc**: 1H NMR (400 MHz):  = 0.00 (br. s, 3 H, NCCH3); 0.94 (br. s, 3 H, NCCH3); 1.11-1.50 (m, 6 H, piperidine-H3-H5); 1.23 (br. s, 3 H, NCCH3); 1.32 (s, 9 H, OC(CH3)3); 1.47 (br. s, 3 H, NCCH3); 2.68 (q, *J* = 12.1 Hz, 1 H, -H4); 2.77 (ddd, *J* = 11.9, 6.0, 5.9 Hz, 1 H, -H4); 3.05 (ddd, *J* = 11.8, 9.7, 6.2 Hz, 1 H, H3); 3.15 (dddd, *J* = 12.2, 10.6, 8.7, 5.9 Hz, 1 H, H5); 3.47 (dd, *J* = 9.7, 5.9 Hz, 1 H, H2); 3.65 (dd, *J* = 9.7, 5.9 Hz, 1 H, H1); 5.04 (d, *J* = 10.6 Hz, 1 H, H6); 6.83-7.22 (m, 15 H, Ph). - 13C NMR (100 MHz):  = 16.94 (t, piperidine-C4), 20.2 (br. q, NC*C*H3), 27.77 (q, OC(*C*H3)3), 33.1 (br. q, NC*C*H3), 34.9 (br. q, NC*C*H3), 36.0 (t, C4), 40.0 (br. t, piperidine-C3,C5), 40.7 (br. t, piperidine-C3,C5), 48.3 (d, C5), 53.8 (d, C2), 54.1 (d, C3), 54.4 (d, C1), 58.2 (s, NC), 60.7 (s, NC), 80.1 (s, O*C*(CH3)3), 84.3 (d, CHON), 126.32 (d, *p*-Ph), 127.05 (d, 2 C, Ph), 127.32 (d, *p*-Ph), 127.39 (d, Ph), 127.43 (d, Ph), 128.3 (d, Ph), 130.3 (br. d, Ph), 131.7 (d, *p*-PhCO), 137.3 (s, Ph), 139.9 (s, Ph), 143.4 (s, Ph), 172.7 (s, COO), 202.8 (s, PhCO).

4-*(R,R)*-**7cc**: 1H NMR (400 MHz):  = 0.21 (br. s, 3 H, NCCH3); 0.53 (br. s, 3 H, NCCH3); 0.66 (br. s, 3 H, NCCH3); 1.01-1.47 (m, 6 H, piperidine-H3-H5); 1.07 (br. s, 3 H, NCCH3); 1.19 (s, 9 H, OC(CH3)3); 1.88 (m, 1 H, -H4); 2.13 (q, *J* = 11.5 Hz, 1 H, -H4); 2.86 (dt, *J* = 10.8, 8.3 Hz, 1 H, H3); 3.25 (m, 1 H, H5); 3.57 (dd, *J* = 8.4, 5.8 Hz, 1 H, H2); 4.22 (dd, *J* = 7.5, 5.9 Hz, 1 H, H1); 5.17 (d, *J* = 9.4 Hz, 1 H, H6); 7.02-7.47 (m, 13 H, Ph); 7.78 (dd, *J* = 7.2, 1.3 Hz, 2 H, *o-*PhCO). - 13C NMR (100 MHz):  = 16.9 (t, piperidine-C4), 20.0 (br. q, NC*C*H3), 20.3 (br. q, NC*C*H3), 27.8 (q, OC(*C*H3)3), 32.8 (br. q, NC*C*H3), 33.7 (br. q, NC*C*H3), 34.6 (t, C4), 39.8 (br. t, piperidine-C3,C5), 40.7 (br. t, piperidine-C3,C5), 47.7 (d, C5), 52.7 (d, C2), 53.2 (d, C3), 54.0 (d, C1), 58.8 (s, NC), 60.3 (s, NC), 80.2 (s, O*C*(CH3)3), 82.9 (d, CHON), 126.5 (d, *p*-Ph), 126.98 (d, Ph), 127.4 (d, Ph), 127.5 (d, Ph), 128.2 (d, Ph), 128.56 (d, Ph), 128.7 (d, Ph), 130.8 (d, Ph), 132.6 (d, Ph), 137.2 (s, Ph), 139.7 (s, Ph), 144.0 (s, Ph), 173.0 (s, COO), 200.5 (s, PhCO).

4-*(S,R)*-**8cc**: 1H NMR (400 MHz):  = 0.16 (br. s, 3 H, NCCH3); 0.72 (br. s, 3 H, NCCH3); 0.98-1.41 (m, 6 H, piperidine-H3-H5); 1.03 (br. s, 3 H, NCCH3); 1.18 (s, 9 H, OC(CH3)3); 1.36 (br. s, 3 H, NCCH3); 2.25 (ddd, *J* = 13.3, 8.3, 5.2 Hz, 1 H, -H4); 2.37 (dt, *J* = 13.3, 9.8 Hz, 1 H, -H4); 2.66 (ddd, *J* = 10.1, 9.8, 9.0 Hz, 1 H, H3); 3.37 (t, *J* = 10.7 Hz, 1 H, H2); 3.55 (m, 1 H, H5); 3.67 (dd, *J* = 10.3, 7.7 Hz, 1 H, H1); 4.72 (d, *J* = 7.1 Hz, 1 H, H6); 6.89 (d, *J* = 7.1 Hz, 2 H, *o*-Ph); 6.93-7.37 (m, 13 H, Ph). - 13C NMR (100 MHz):  = 16.90 (t, piperidine-C4), 20.2 (br. q, NC*C*H3), 27.72 (q, OC(*C*H3)3), 32.6 (t, C4), 33.9 (br. q, NC*C*H3), 34.5 (br. q, NC*C*H3), 40.5 (br. t, piperidine-C3,C5), 40.8 (br. t, piperidine-C3,C5), 46.7 (d, C5), 51.7 (d, C2), 56.1 (d, C3), 56.8 (d, C1), 58.9 (s, NC), 60.6 (s, NC), 80.1 (s, O*C*(CH3)3), 88.4 (d, CHON), 126.6 (d, Ph), 127.2 (d, Ph), 127.3 (d, Ph), 127.4 (d, Ph), 127.6 (d, Ph), 127.92 (d, Ph), 128.1 (d, Ph), 129.8 (d, Ph), 132.1 (d, *p*-PhCO), 137.6 (s, Ph), 139.9 (s, Ph), 140.4 (s, Ph), 172.7 (s, COO), 203.0 (s, PhCO).

4-*(S,S)*-**8cc**: 1H NMR (400 MHz):  = 0.32 (br. s, 3 H, NCCH3); 0.91 (br. s, 3 H, NCCH3); 1.08-1.56 (m, 12 H, piperidine-H3-H5, 2 NCCH3); 1.20 (s, 9 H, OC(CH3)3); 2.10 (ddd, *J* = 13.5, 9.0, 7.6 Hz, 1 H, -H4); 2.25 (ddd, *J* = 13.5, 9.2, 7.7 Hz, 1 H, -H4); 2.65 (m, 1 H, H3); 3.42 (m, 2 H, H1, H2); 3.69 (m, 1 H, H5); 4.59 (d, *J* = 6.6 Hz, 1 H, H6); 6.77 (d, *J* = 7.1 Hz, 2 H, *o*-Ph); 6.81-7.30 (m, 10 H, Ph), 7.32 (m, 1 H, *p*-PhCO), 7.36 (d, *J* = 7.2 Hz, 2 H, *o*-PhCO). - 13C NMR (100 MHz):  = 16.90 (t, piperidine-C4), 20.3 (br. q, NC*C*H3), 20.5 (br. q, NC*C*H3), 27.67 (q, OC(*C*H3)3), 29.9 (t, C4), 33.7 (br. q, NC*C*H3), 34.5 (br. q, NC*C*H3), 40.2 (br. t, piperidine-C3,C5), 45.5 (d, C5), 51.7 (d, C2), 55.2 (d, C3), 57.8 (d, C1), 59.5 (s, NC), 59.9 (s, NC), 80.10 (s, O*C*(CH3)3), 87.3 (d, CHON), 126.44 (d, *p*-Ph), 127.10 (d, Ph), 127.22 (d, *p*-Ph), 127.39 (d, Ph), 127.78 (d, Ph), 128.12 (d, Ph), 128.24 (br. d, Ph) 129.07 (d, Ph), 132.30 (d, *p*-PhCO), 137.45 (s, Ph), 140.06 (s, Ph), 141.15 (s, Ph), 173.1 (s, COO), 202.0 (s, PhCO).

4-*(S,R)*-**9cc**: 1H NMR (400 MHz):  = 0.20 (br. s, 3 H, NCCH3); 0.98-1.57 (m, 15 H, piperidine-H3-H5, 3 NCCH3); 0.93 (s, 9 H, OC(CH3)3); 2.16 (q, *J* = 12.5 Hz, 1 H, -H4); 2.28 (m, 1 H, -H4); 3.26 (ddd, *J* = 11.7, 9.9, 6.6 Hz, 1 H, H3); 3.39 (dd, *J* = 9.7, 5.7 Hz, 1 H, H2); 3.55 (m, 1 H, H5); 3.82 (dd, *J* = 9.1, 6.0 Hz, 1 H, H1); 4.88 (d, *J* = 6.7 Hz, 1 H, H6); 6.72-7.32 (m, 15 H, Ph). - 13C NMR (100 MHz):  = 16.90 (t, piperidine-C4), 20.5 (br. q, NC*C*H3), 27.36 (q, OC(*C*H3)3), 33.7 (t, C4), 34.4 (br. q, NC*C*H3), 40.8 (br. t, piperidine-C3,C5), 46.8 (d, C5), 50.0 (d, C2), 53.6 (d, C3), 54.6 (d, C1), 59.2 (s, NC), 59.9 (s, NC), 79.8 (s, O*C*(CH3)3), 89.0 (d, CHON), 127.13 (d, 2 C, Ph), 127.26 (d, Ph), 127.84 (d, Ph), 127.96 (d, Ph), 128.12 (d, Ph), 128.31 (d, Ph), 128.51 (d, Ph), 132.30 (d, *p*-PhCO), 137.06 (s, Ph), 139.74 (s, Ph), 141.96 (s, Ph), 171.5 (s, COO), 202.7 (s, PhCO).

MS (CI, NH3, pos.), *m/z* (%): 596 (M++H+, 100), 439 (5), 383 (2) 174 (TEMPO+NH4+, 38), 157 (9). - C39H49NO4 (595.81): calcd. C 78.62 H 8.29 N 2.35; found C 78.34 H 8.33 N 2.37.

*(2S*,3S*,5R*)-***Diethyl 3-(Methoxycarbonyl)-2-phenyl-5-[1-methyl-1-(2,2,6,6-tetramethylpiperidin-1-yloxy)ethyl)]cyclopentane-1,1-dicarboxylate 7da,**

*(2S*,3S*,5S*)-***Diethyl 3-(Methoxycarbonyl)-2-phenyl-5-[1-methyl-1-(2,2,6,6-tetramethylpiperidin-1-yloxy)ethyl)]cyclopentane-1,1-dicarboxylate 8da**: Colorless oil as an inseparable 1.8:1 diastereomeric mixture. In solution under ambient daylight, **7da** eliminates slowly *N*-hydroxytetramethylpiperidine to give **12da**. In contrast, the isomer **8da** underwent this transformation only to a negligible extent. - IR (film): 3063, 2977, 2934, 2871, 1740, 1721, 1455, 1372, 1256, 1193, 700. - **7da**: 1H NMR (400 MHz):  = 0.79 (t, *J* = 7.2 Hz, 3 H, -OCH2C*H3*); 1.11 (s, 3 H, NCCH3); 1.15-1.65 (m, 6 H, piperidine-H3-H5); 1.17 (s, 3 H, NCCH3); 1.19 (s, 3 H, NCCH3); 1.22 (s, 3 H, NCCH3); 1.29 (t, *J* = 7.1 Hz, 3 H, OCH2C*H3*); 1.33 (s, 3 H, CC*H*3); 1.43 (s, 3 H, CC*H*3); 2.07 (dt, *J* = 12.6, 12.0 Hz, 1 H, -H4); 2.60 (ps.-quint, *J* = 12.5, 6.2 Hz, 1 H, -H4); 3.16 (m, 2 H, H3, -OCH2); 3.64 (s, 3 H, OCH3); 3.69 (dq, *J* = 10.7, 7.1 Hz, 1 H, -OCH2); 3.77 (dd, *J* = 13.1, 5.9 Hz, 1 H, H5); 4.11 (dq, *J* = 10.8, 7.2 Hz, 1 H, OCH2); 4.38 (dq, *J* = 10.8, 7.2 Hz, 1 H, OCH2); 4.66 (d, *J* = 10.3 Hz, 1 H, H2); 7.25 (m, 5 H, Ph). - 13C NMR (100 MHz):  = 13.2 (q, OCH2*C*H3), 13.6 (q, OCH2*C*H3), 17.0 (t, piperidine-C4), 20.6 (q, NC*C*H3), 21.4 (q, NC*C*H3), 22.6 (q, C*C*H3), 25.4 (q, C*C*H3), 31.4 (t, C4), 34.8 (q, NC*C*H3), 35.4 (q, NC*C*H3), 41.07, 41.08 (2 t, piperidine-C3,C5), 48.1 (d, C5), 51.7 (q, OCH3), 56.2, 56.6 (2 d, C2, C3), 59.35 (s, NC), 59.40 (s, NC), 60.7 (t, OCH2), 61.4 (t, OCH2), 66.8 (s, C1), 80.65 (s, CON), 127.1 (d, *p*-Ph), 127.8 (d, Ph), 129.0 (d, Ph), 139.7 (s, *i*-Ph), 170.1 (s, COOEt), 171.2 (s, COOEt), 174.2 (s, COOMe). - **8da**: 1H NMR (400 MHz):  = 1.10 (s, 3 H, NCCH3); 1.15 (s, 6 H, NCCH3); 1.15-1.65 (m, 6 H, Piperidine-H3-H5); 1.16 (t, *J* = 7.1 Hz, 3 H, OCH2C*H3*); 1.19 (m, 3 H, OCH2C*H3*); 1.21 (s, 3 H, NCCH3); 1.31 (s, 3 H, CC*H*3); 1.39 (s, 3 H, CC*H*3); 2.38 (ddd, *J* = 13.5, 8.5, 4.5 Hz, 1 H, -H4); 2.56 (dt, *J* = 13.3, 11.8 Hz, 1 H, -H4); 3.62 (s, 3 H, OCH3); 3.74 (m, 1 H, H5); 3.85 (dt, *J* = 11.3, 4.5, 1 H, H3); 3.99 (d, *J* = 11.1 Hz, 1 H, H2); 4.01 (dq, *J* = 10.8, 7.1 Hz, 1 H, OCH2); 4.07 (dq, *J* = 10.7, 7.2 Hz, 1 H, OCH2); 4.14 (dq, *J* = 10.8, 7.1 Hz, 1 H, OCH2); 4.23 (dq, *J* = 10.8, 7.1 Hz, 1 H, OCH2); 7.25 (m, 5 H, Ph). - 13C NMR (100 MHz):  = 13.5 (q, OCH2*C*H3), 13.7 (q, OCH2*C*H3), 17.0 (t, piperidine-C4), 20.5 (q, NC*C*H3), 21.0 (q, NC*C*H3), 23.3 (q, C*C*H3), 24.9 (q, C*C*H3), 29.9 (t, C4), 35.1 (q, NC*C*H3), 35.5 (q, NC*C*H3), 41.2 (t, piperidine-C3,C5), 45.0 (d, C5), 51.8 (q, OCH3), 57.3 (d, C3), 58.6 (d, C2), 59.38 (s, NC), 59.45 (s, NC), 60.5 (t, OCH2), 61.1 (t, OCH2), 67.0 (s, C1), 80.69 (s, CON), 127.2 (d, *p*-Ph), 127.6 (d, Ph), 129.2 (d, Ph), 136.5 (s, *i*-Ph), 168.7 (s, COOEt), 170.8 (s, COOEt), 176.1 (s, COOMe). - MS (CI, NH3, pos.), *m/z* (%): 546 (M++H+, 3), 406 (24), 389 (14), 158 (100). - C31H47NO7 (545.72): calcd. C 68.23 H 8.68 N 2.57; found C 68.13 H 9.06 N 2.32.

*(2S*,3S*,5R*)*-**Diethyl 5-(Hydroxymethyl)-3-(methoxycarbonyl)-2-phenylcyclopentane-1,1-dicarboxylate 11aa**:

A mixture of 518 mg (1 mmol) **7aa**, 6 ml AcOH, 2 ml water and 2 ml THF and 0.85 g (13 mmol) zinc dust was heated to 50oC under N2 until **7aa** was consumed by tlc (ca. 1 h). The reaction mixture was diluted with dichloromethane and filtered through a plug of silica gel. The solvent mixture was evaporated and the oily residue was partitioned between water and ether and the aqueous layer was extracted three times with ether. After drying of the organic layer over Na2SO4 and evaporation of the solvent, the yellow viscous oil was purified by flash column chromatography (silica gel hexane/EtOAc with a gradient from 15:1 to 1:1) to give some material that consists presumably of lactones, and 240 mg (63%) of the alcohol **11aa** as a colorless oil. - IR (film): 3533, 3460, 3032, 2983, 2956, 1724, 1455, 1369, 1257, 1197, 1051, 1027, 702. - 1H NMR (400 MHz): = 0.72 (t, *J* = 7.2 Hz, 3 H, OCH2C*H3*); 1.21 (t, *J* = 7.1 Hz, 3 H, OCH2C*H3*); 1.91 (ddd, *J* = 12.6, 11.5, 10.8 Hz, 1 H, -H4); 2.41 (ddd, *J* = 12.8, 7.4, 7.3 Hz, 1 H, -H4); 2.74 (br. s, 1 H, OH); 3.19 (m, 2 H, H3, H5); 3.35 (dq, *J* = 10.7, 7.2 Hz, 1 H, OCH2); 3.55 (m, 4 H, C*H*2OH, OCH3); 3.72 (dd, *J* = 11.3, 5.9 Hz, 1 H, C*H*2OH); 3.74 (dq, *J* = 10.7, 7.2 Hz, 1 H, OCH2); 4.13 (dq, *J* = 10.8, 7.2 Hz, 1 H, OCH2); 4.24 (dq, *J* = 10.8, 7.2 Hz, 1 H, OCH2); 4.39 (d, *J* = 9.1 Hz, 1 H, H2); 7.17 (m, 5 H, Ph). - 13C NMR (100 MHz):  = 13.2, 13.9 (2 q, 2 OCH2*C*H3), 31.6 (t, C4), 48.0, 49.1 (2 d, C3, C5), 51.8 (q, OCH3), 54.3 (d, C2), 61.1, 61.6 (2 t, 2 OCH2), 62.9 (t, CH2OH), 66.9 (s, C1), 127.1 (d, *p*-Ph), 128.0 (d, Ph), 128.6 (d, Ph), 140.0 (s, Ph), 170.25, 170.28 (2 s, 2 COOEt), 174.1 (s, COOMe). - MS, *m/z* (%): 378 (M+, 1), 360 (5), 347 (6), 332 (67), 301 (12), 287 (9), 274 (78), 259 (20), 228 (100), 214 (15), 199 (12), 181 (18), 169 (19), 155 (15), 141 (23), 115 (19), 91 (10), 77 (7). - C20H26O7 (378.42): calcd. C 63.48 H 6.93; found C 63.51 H 7.06.

**Tandem Michael Addition/Radical 5-*exo* Cyclization of 1d,e and 2a,b induced by 5 (General Procedure):**

To a solution of 209 l (1.6 mmol) *i*-Pr2NH in 10 ml dry THF was added 1.0 ml (1.6 mmol) BuLi (1.6*M* in hexane) at -78oC under N2. After stirring for 30 min, 2.53 ml dry HMPA was added via syringe, followed by a solution of 1.2 mmol esters **1d,e** in 0.5 ml dry THF (Final concentration 75 m*M*). The reaction mixture was stirred for 30 min at -78oC and 1 mmol of **2a** or **b** was added. The yellow turbid reaction mixture was stirred at -78oC for 30 min and then slowly warmed to a maximum temperature of 0oC. After the reaction was complete by tlc (ca. 1.5 h), 700 mg (2.1 mmol) **5** was added in one portion with vigorous stirring at -40oC. The ferrocenium salt was consumed very quickly and the orange solution was immediately treated with further portions of **5** until the mixture remained green-blue (On average total 800-900 mg of **5**). Stirring at -40oC was continued for 1 h. The reaction mixture was quenched with 4 drops of water, stirred for 5 min, diluted with ether to the double volume and filtered through a plug of silica gel. The solvent was evaporated and the inhomogeneous residue was preadsorbed on silica gel and purified by column chromatography (silica gel, hexane/EtOAc 50:1 gradient to 1:1) to give >95% ferrocene, followed by **14**, **12(13)**, **16**, **17**, and **15**.

When KO*t*Bu was used as an additive, the addition step was conducted in only 7 ml THF. Immediately prior to addition of **5**, 3 ml (3 mmol) of a 1*M* solution of KO*t*Bu in THF was added via syringe. The reaction proceeded then as described above, except that more **5** was required (ca. 1g (3 mmol) of **5**).

*(2S*,3S*,5S*)-* **and** *(2S*,3S*,5R*)-***Diethyl 5-Isopropenyl-3-(methoxycarbonyl)-2-phenylcyclopentane-1,1-dicarboxylate 12da**: 3:1 Diastereomeric mixture as a colorless oil. - IR (film): 3064, 3033, 2983, 2955, 2880, 1739, 1722, 1454, 1368, 1256, 1196, 1170, 1114, 1058, 1035, 898, 754, 701. - *(2S*,3S*,5S*)-***12da**: 1H NMR (400 MHz):  = 0.68 (t, *J* = 7.2 Hz, 3 H, -OCH2C*H3*); 1.14 (t, *J* = 7.2 Hz, 3 H, -OCH2C*H3*); 1.74 (br. s, 3 H, H3CC=); 2.09 (q, *J* = 12.1 Hz, 1 H, -H4); 2.22 (ddd, *J* = 12.6, 6.4, 6.2 Hz, 1 H, -H4); 3.17 (m, 2 H, H3, -OCH2); 3.51 (s, 3 H, OCH3); 3.65 (dd, *J* = 12.6, 6.4 Hz, 1 H, H5); 3.71 (dq, *J* = 10.8, 7.2 Hz, 1 H, -OCH2); 3.97 (dq, *J* = 10.7, 7.1 Hz, 1 H, -OCH2); 4.12 (dq, *J* = 10.8, 7.2 Hz, 1 H, -OCH2); 4.53 (d, *J* = 11.2 Hz, 1 H, H2); 4.81 (br. s, 1 H, =CH2); 4.82 (br. s, 1 H, =CH2); 7.17 (m, 5 H, Ph). - 13C NMR (100 MHz):  = 13.1 (q, OCH2*C*H3), 13.6 (q, OCH2*C*H3), 23.4 (q, H3*C*C=), 34.0 (t, C4), 48.3 (d, C5), 51.2 (d, C3), 51.6 (q, OCH3), 54.3 (d, C2), 60.8 (t, OCH2), 61.0 (t, OCH2), 68.55 (s, C1), 112.7 (t, =CH2), 127.0 (d, *p*-Ph), 127.8 (d, Ph), 128.6 (d, Ph), 138.9 (s), 144.0 (s), 170.0 (s, COO), 170.2 (s, COO), 173.6 (s, COO). - *(2S*,3S*,5R*)-***12da**: 1H NMR (400 MHz):  = 1.00 (t, *J* = 7.1 Hz, 3 H, OCH2C*H3*); 1.09 (t, *J* = 7.1 Hz, 3 H,OCH2C*H3*); 1.74 (br. s, 3 H, H3CC=); 2.13 (m, 1 H, -H4); 2.62 (dt, *J* = 13.1, 11.7 Hz, 1 H, -H4); 3.45 (dd, *J* = 11.4, 9.1 Hz 1 H, H5); 3.53 (s, 3 H, OCH3); 3.70 (m, 1 H, H3); 3.90 (dq, *J* = 10.7, 7.3 Hz, 2 H, OCH2); 3.98 (d, *J* = 10.6 Hz, 1 H, H2); 4.05 (m, 2 H, OCH2); 4.81 (br. s, 1 H, =CH2); 4.82 (br. s, 1 H, =CH2); 7.05-7.30 (m, 5 H, Ph). - 13C NMR (100 MHz):  = 13.1 (q, OCH2*C*H3), 13.5 (q, OCH2*C*H3), 22.8 (q, H3*C*C=), 32.2 (t, C4), 45.6 (d, C5), 51.7 (q, OCH3), 52.9 (d, C3), 56.9 (d, C2), 60.4 (t, OCH2), 60.9 (t, OCH2), 68.65 (s, C1), 113.2 (t, =CH2), 127.1 (d, *p*-Ph), 127.6 (d, Ph), 129.2 (d, Ph), 136.9 (s), 142.9 (s), 168.3 (s, COO), 170.4 (s, COO), 175.5 (s, COO). - MS (CI, NH3, pos.), *m/z* (%): 406 (M++ NH4+, 100), 389 (M++H+, 63), 298 (39). - C22H28O6 (388.46): calcd. C 68.02 H 7.27; found C 67.92 H 7.33.

*(2S*,3S*,5S*)-***Diethyl 5-Isopropyl-3-(methoxycarbonyl)-2-phenylcyclopentane-1,1-dicarboxylate 14da** (Detectable Resonances): 1H NMR (400 MHz): 0.75 (t, *J* = 7.2 Hz, 3 H, -OCH2C*H3*); 0.84 (d, *J* = 6.6 Hz, 3 H, *H3*CCH); 0.97 (d, *J* = 6.7 Hz, 3 H, *H3*CCH); 1.21 (t, *J* = 7.1 Hz, 3 H, -OCH2C*H3*); 1.74 (m, 2 H, H4, (H3C)2C*H*); 2.10 (m, 1 H, H4); 2.69 (m, 1 H, H3); 2.86 (m, 1 H, H5); 3.55 (s, 3 H, OCH3); 4.42 (d, *J* = 9.5 Hz, 1 H, H2); 7.05-7.30 (m, 5 H, Ph). - 13C NMR (100 MHz): 13.2 (q, OCH2*C*H3), 13.8 (q, OCH2*C*H3), 19.7 (q, CH*C*H3), 23.6 (q, H3*C*CH), 28.7 (d, *C*HCH3), 31.0 (t, C4), 49.2 (d, C5), 51.0 (q, OCH3), 52.2 (d, C3), 55.8 (d, C2), 60.7 (t, OCH2), 61.1 (t, OCH2), 68.0 (s, C1), 126.9 (d, *p*-Ph), 127.7 (d, Ph), 128.9 (d, Ph), 140.3 (s), 169.2 (s, COO), 170.6 (s, COO), 173.9 (s, COO).

*(2S*,3S*,5S*)-***Diethyl 5-(1-Hydroxy-1-methylethyl)-3-(methoxycarbonyl)-2-phenylcyclopentane-1,1-dicarboxylate 15da**: Colorless crystals. - mp. 86-88oC. - IR (KBr): 3529, 3479, 3033, 3007, 2980, 2956, 1736, 1708, 1436, 1371, 1284, 1242, 1196, 1174, 1041, 701. - 1H NMR (400 MHz):  = 0.97 (t, *J* = 7.2 Hz, 3 H, -OCH2C*H3*); 1.14 (t, *J* = 7.1 Hz, 3 H, -OCH2C*H3*); 1.18 (s, 3 H, HOCC*H3*); 1.27 (s, 3 H, HOCC*H3*); 2.13 (ddd, *J* = 13.1, 10.0, 6.6 Hz, 1 H, -H4); 2.60 (ddd, *J* = 13.1, 10.6, 10.0 Hz, 1 H, -H4); 2.93 (t, *J* = 9.9 Hz, 1 H, H5); 3.46 (br. s,1 H, OH); 3.54 (s, 3 H, OCH3); 3.64 (ddd, *J* = 11.5, 11.2, 6.6 Hz, 1 H, H3); 3.82 (dq, *J* = 10.8, 7.2 Hz, 1 H, -OCH2); 3.97 (dq, *J* = 10.8, 7.2 Hz, 1 H, -OCH2); 4.03 (d, *J* = 11.9 Hz, 1 H, H2); 4.13 (dq, *J* = 10.8, 7.1 Hz, 1 H, -OCH2); 4.17 (dq, *J* = 10.8, 7.1 Hz, 1 H, -OCH2); 7.20 (m, 5 H, Ph). - 13C NMR (100 MHz):  = 13.4 (q, OCH2*C*H3), 13.8 (q, OCH2*C*H3), 29.5 (t, C4), 29.6 (q, C*C*H3), 30.0 (q, C*C*H3), 45.4 (d, C3), 51.9 (q, OCH3), 57.2 (d, C5), 57.5 (d, C2), 61.4 (t, OCH2), 61.6 (t, OCH2), 67.5 (s, C1), 70.9 (s, COH), 127.3 (d, *p*-Ph), 127.7 (d, Ph), 129.0 (d, Ph), 136.6 (s, *i*-Ph), 170.8 (s, COOEt), 171.6 (s, COOEt), 175.3 (s, COOMe). - MS, *m/z* (%): 406 (M+, 4), 391 (9), 388 (30), 360 (23), 345 (14), 314 (53), 269 (43), 256 (14), 241 (15), 228 (34), 186 (100), 169 (18), 140 (34), 115 (12). - C22H30O7 (402.47): calcd. C 65.01 H 7.44; found C 65.23 H 7.56. - In contrast to the stable *(2S*,3S*,5S*)-***15da**, the corresponding *(2S*,3S*,5R*)-***15da** underwent very facile lactonization to **17da** that prevented further characterization.

*(2S*,3S*,5R*)-* **and** *(2S*,3S*,5S*)-***Diethyl 5-(1-Ferrocenyl-1-methylethyl)-3-(methoxycarbonyl)-2-phenylcyclopentane-1,1-dicarboxylate 16da**: Orange oil as an inseparable 2:1 diastereomeric mixture. - IR (film): 3093, 3064, 3032, 2982, 2953, 2906, 1737, 1455, 1368, 1247, 1226, 1196, 1172, 1106, 1041, 733, 701. - *(2S*,3S*,5R*)-***16da**: 1H NMR (400 MHz):  = 0.72 (t, *J* = 7.1 Hz, 3 H, -OCH2C*H3*); 1.14 (s, 3 H, CCH3); 1.24 (t, *J* = 7.1 Hz, 3 H, -OCH2C*H3*); 1.45 (s, 3 H, CCH3); 1.74 (ddd, *J* = 12.3, 6.4, 5.8 Hz, 1 H, -H4); 1.88 (dt, *J* = 13.0, 12.2 Hz, 1 H, -H4); 2.80 (m, 1 H, H3); 2.95 (dd, *J* = 13.7, 5.7 Hz, 1 H, H5); 3.00 (dq, *J* = 10.7, 7.2 Hz, 1 H, -OCH2); 3.47 (s, 3 H, OCH3); 3.64 (m, 1 H, -OCH2); 3.88-4.16 (m, 5 H,-OCH2, C5H4); 4.08 (s, 5 H, C5H5); 4.23 (dq, *J* = 10.9, 7.1 Hz, 1 H, -OCH2); 4.43 (d, *J* = 9.6 Hz, 1 H, H2); 7.00 (d, *J* = 6.6 Hz, 2 H, *o*-Ph); 7.02-7.22 (m, 3 H, *m*-, *p*-Ph). - 13C NMR (100 MHz):  = 13.3 (q, OCH2*C*H3), 13.70 (q, OCH2*C*H3), 21.1 (q, C*C*H3), 27.8 (q, C*C*H3), 31.8 (t, C4), 35.79 (s, *C*CH3), 48.6 (d, C3), 51.7 (q, OCH3), 57.2 (d, C5), 58.1 (d, C2), 60.7 (t, OCH2), 61.4 (t, OCH2), 66.1 (d, C5H4), 66.3 (d+s, 2 C, C1, C5H4), 67.1 (d, C5H4), 67.4 (d, C5H4), 68.5 (d, C5H5), 102.9 (s, subst. C5H4), 127.1 (d, *p*-Ph), 127.8 (d, Ph), 128.9 (d, Ph), 140.4 (s, Ph), 170.0 (s, COO), 171.5 (s, COO), 174.1 (s, COO). - *(2S*,3S*,5S*)-***16da**: 1H NMR (400 MHz):  = 1.09 (t, *J* = 7.1 Hz, 3 H, OCH2C*H3*); 1.10 (t, *J* = 7.1 Hz, 3 H, OCH2C*H3*); 1.20 (s, 3 H, CCH3); 1.34 (s, 3 H, CCH3); 1.68 (m, 1 H, -H4); 2.30 (dt, *J* = 12.7, 12.3 Hz, 1 H, -H4); 3.05 (m, 1 H, H5); 3.45 (s, 3 H, OCH3); 3.70 (m, 1 H, H3); 3.75 (d, *J* = 11.2 Hz, 1 H, H2); 3.88-4.16 (m, 8 H, OCH2, C5H4); 4.06 (s, 5 H, C5H5); 7.02-7.22 (m, 5 H,Ph). - 13C NMR (100 MHz): = 13.67 (q, OCH2*C*H3), 13.8 (q, OCH2*C*H3), 23.7 (q, C*C*H3), 27.3 (q, C*C*H3), 30.5 (t, C4), 35.82 (s, *C*CH3), 45.1 (d, C3), 51.8 (q, OCH3), 58.4 (d, C5), 59.2 (d, C2), 60.5 (t, OCH2), 61.0 (t, OCH2), 66.3 (d, C5H4), 66.4 (d+s, 2 C, C1, C5H4), 66.5 (d, C5H4), 66.6 (d, C5H4), 68.5 (d, C5H5), 103.0 (s, subst. C5H4), 127.3 (d, *p*-Ph), 127.8 (d, Ph), 129.1 (d, Ph), 136.5 (s, Ph), 168.5 (s, COO), 170.9 (s, COO), 175.9 (s, COO). - MS, *m/z* (%): 574 (M+, 30), 388 (55), 330 (25), 314 (63), 268 (73), 250 (100), 226 (28), 209 (42), 181 (33), 171 (37), 141 (39), 135 (55), 131 (55), 109 (22), 91 (17). - HRMS *m/z*, M+ C32H38FeO6: calcd.: 574.2018; found: 574.2009  2.

*(1S*,5R*,7S*,8S*)*-**1-(Ethoxycarbonyl)-7-(methoxycarbonyl)-4,4-dimethyl-8-phenyl-3-oxabicyclo[3.3.0]octan-2-one 17da**: Colorless Crystals. - mp. 102-104oC. - IR (film): 3061, 3035, 2991, 2952, 1770, 1733, 1727, 1454, 1434, 1376, 1271, 1241, 1174, 1120, 1043, 998, 698. - 1H NMR (400 MHz):  = 0.77 (t, *J* = 7.1 Hz, 3 H, OCH2C*H3*); 1.31 (s, 3 H, CCH3); 1.40 (s, 3 H, CCH3); 1.98 (q, *J* = 12.3 Hz, 1 H, -H4); 2.29 (ddd, *J* = 12.3, 7.0, 5.3 Hz, 1 H, -H4); 3.24 (dd, *J* = 12.1, 7.0 Hz, 1 H, H5); 3.40 (dt, *J* = 12.1, 5.3 Hz, 1 H, H3); 3.57 (s, 3 H, OCH3); 3.61 (2 dq, *J* = 10.8, 7.2 Hz, 2 H, OCH2); 4.03 (d, *J* = 11.8 Hz, 1 H, H2); 7.20 (m, 3 H, Ph); 7.38 (d, *J* = 7.4 Hz, 2 H, Ph). - 13C NMR (100 MHz):  = 13.4 (q, OCH2*C*H3), 23.5 (q, C*C*H3), 29.3 (q, C*C*H3), 32.6 (t, C4), 49.2 (d, C3), 52.1 (q, OCH3), 55.0 (d, C5), 56.2 (d, C2), 62.0 (t, OCH2), 67.0 (s, C1), 82.6 (s, OCMe2), 127.5 (d, Ph), 128.1 (d, Ph), 128.7 (d, Ph), 136.2 (s, Ph), 168.9 (s, COO), 172.6 (s, COO), 174.4 (s, COO). - MS, *m/z* (%): 360 (M+, 100), 345 (10), 329 (8), 314 (40), 300 (28), 287 (18), 269 (55), 256 (41), 241 (17), 228 (93), 209 (30), 183 (43), 169 (45), 141 (55), 115 (40), 91 (22), 77 (10). - HRMS *m/z*, M+ C20H24O6: calcd. 360.1573; found 360.1568.

*(2S*,3S*,5S*)-* and *(2S*,3S*,5R*)-***Diethyl 3-(*tert*-Butyloxycarbonyl)-5-isopropenyl-2-phenylcyclopentane-1,1-dicarboxylate 12ea**: Colorless oil as a inseparable 16:1 diastereomeric mixture accompanied by **14ea**. - IR (film): 3064, 3033, 2979, 2938, 2906, 1725, 1455, 1368, 1255, 1195, 1154, 700. - *(2S*,3S*,5S*)-***12ea**: 1H NMR (400 MHz):  = 0.67 (t, *J* = 7.1 Hz, 3 H, -OCH2C*H3*); 1.14 (t, *J* = 7.2 Hz, 3 H, -OCH2C*H3*); 1.21 (s, 9 H, OC(CH3)3); 1.74 (br. s, 3 H, H3CC=); 2.07 (q, *J* = 12.1 Hz, 1 H, -H4); 2.17 (dt, *J* = 12.6, 6.5 Hz, 1 H, -H4); 3.06 (dt, *J* = 11.6, 6.5 Hz, 1 H, H3); 3.22 (dq, *J* = 10.6, 7.1 Hz, -OCH2); 3.62 (dd, *J* = 12.2, 6.5 Hz, 1 H, H5); 3.73 (dq, *J* = 10.7, 7.1 Hz, 1 H, -OCH2); 3.97 (dq, *J* = 10.7, 7.2 Hz, 1 H, -OCH2); 4.11 (m, 1 H, -OCH2); 4.39 (d, *J* = 11.6 Hz, 1 H, H2); 4.82 (br. s, 2 H, =CH2); 7.16 (m, 5 H, Ph). - 13C NMR (100 MHz):  = 13.2 (q, OCH2*C*H3), 13.8 (q, OCH2*C*H3), 23.5 (q, H3*C*C=), 27.8 (q, OC(*C*H3)3), 33.8 (t, C4), 49.3 (d, C5), 51.2 (d, C3), 55.1 (d, C2), 60.9 (t, OCH2), 61.1 (t, OCH2), 68.7 (s, C1), 80.4 (s, O*C*(CH3)3), 112.9 (t, =CH2), 127.0 (d, *p*-Ph), 127.8 (d, Ph), 128.9 (d, Ph), 139.1 (s), 144.5 (s), 170.2 (s, COO), 170.6 (s, COO), 172.6 (s, COO). - *(2S*,3S*,5R*)-***12ea**: 1H NMR (400 MHz):  = 1.02 (t, *J* = 7.2 Hz, 3 H, OCH2C*H3*); 1.10 (t, *J* = 7.1 Hz, 3 H,OCH2C*H3*); 1.23 (s, 9 H, OC(CH3)3); 1.66 (br. s, 3 H, H3CC=); 2.13 (m, 1 H, -H4); 2.52 (dt, *J* = 13.2, 11.4 Hz, 1 H, -H4); 3.42 (dd, *J* = 11.1, 9.9, 1 H, H5); 3.62 (m, 1 H, H3); 3.84 (d, *J* = 10.9 Hz, 1 H, H2); 3.90 (dq, *J* = 10.7, 7.2 Hz, 2 H, OCH2); 4.11 (m, 2 H, OCH2); 4.82 (br. s, 2 H, =CH2); 7.16 (m, 3 H, Ph); 7.28 (m, 2 H, Ph). - 13C NMR (100 MHz) (Detectable resonances):  = 13.2 (q, OCH2*C*H3), 13.8 (q, OCH2*C*H3), 23.0 (q, H3*C*C=), 27.9 (q, OC(*C*H3)3), 31.8 (t, C4), 47.1 (d, C5), 53.0 (d, C3), 57.6 (d, C2), 60.5 (t, OCH2), 61.1 (t, OCH2), 68.9 (s, C1), 113.2 (t, =CH2), 127.1 (d, *p*-Ph), 129.3 (d, Ph), 129.5 (d, Ph). - MS, *m/z* (%): 430 (M+, 9), 374 (100), 357 (19), 329 (24), 300 (39), 282 (22), 255 (47), 237 (12), 226 (18), 209 (17), 181 (12), 167 (9), 131 (11), 91 (9), 57 (34). - C25H34O6 (430.53): calcd. C 69.74 H 7.96; found C 69.82 H 8.17.

*(2S*,3S*,5S*)-***Diethyl 3-(*tert*-Butyloxycarbonyl)-5-isopropyl-2-phenylcyclopentane-1,1-dicarboxylate 14ea**: 1H NMR (400 MHz):  = 0.71 (t, *J* = 7.1 Hz, 3 H, -OCH2C*H3*); 0.84 (d, *J* = 6.6 Hz, 3 H, *H3*CCH); 0.96 (d, *J* = 6.7 Hz, 3 H, *H3*CCH); 1.22 (t, *J* = 7.1 Hz, 3 H, -OCH2C*H3*); 1.25 (s, 9 H, OC(CH3)3); 1.77 (m, 2 H, (H3C)2C*H*, -H4); 2.17 (m, 1 H, -H4); 2.85 (dt, *J* = 12.5, 6.3 Hz, 1 H, H5); 2.99 (ddd, *J* = 11.1, 10.3, 7.1 Hz, 1 H, H3); 3.22 (m, 1H, -OCH2); 3.66 (dq, *J* = 10.7, 7.1 Hz, 1 H, -OCH2); 4.11 (m, 1 H, -OCH2); 4.22 (d, *J* = 10.8, 7.2 Hz, 1 H, -OCH2); 4.29 (d, *J* = 10.1 Hz, 1 H, H2); 7.16 (m, 5 H, Ph). - 13C NMR (100 MHz): 13.3 (q, OCH2*C*H3), 14.0 (q, OCH2*C*H3), 19.7 (q, CH*C*H3), 23.4 (q, H3*C*CH), 27.9 (q, OC(*C*H3)3), 28.7 (d, *C*H(CH3)2), 30.6 (t, C4), 50.2 (d, C5), 52.1 (d, C3), 55.5 (d, C2), 60.7 (t, OCH2), 61.2 (t, OCH2), 67.9 (s, C1), 80.3 (s, O*C*(CH3)3), 126.8 (d, *p*-Ph), 127.6 (d, Ph), 129.0 (d, Ph), 140.5 (s, Ph), 170.5 (s, COO), 171.1 (s, COO), 173.0 (s, COO).

*(2S*,3S*,5R*)-* **and** *(2S*,3S*,5S*)-***Diethyl 3-(*tert*-Butyloxycarbonyl)-5-(1-ferrocenyl-1-methylethyl)-2-phenylcyclopentane-1,1-dicarboxylate 16ea**: Orange oil as a partly separable 2:1 diastereomeric mixture. *(2S*,3S*,5R*)-***16ea**: IR (film): 3094, 3032, 2979, 2937, 2905, 1732, 1729, 1725, 1720, 1475, 1455, 1392, 1368, 1279, 1250, 1154, 1106, 1041, 907, 819, 734, 700. - 1H NMR (400 MHz):  = 0.69 (t, *J* = 7.1 Hz, 3 H, -OCH2C*H3*); 1.15 (s, 12 H, OC(CH3)3, CCH3); 1.24 (t, *J* = 7.2 Hz, 3 H, -OCH2C*H3*); 1.46 (s, 3 H, CCH3); 1.66 (dt, *J* = 12.3, 6.2 Hz, 1 H, -H4); 1.84 (q, *J* = 12.2 Hz, 1 H, -H4); 2.67 (ddd, *J* = 11.0, 10.3, 6.4 Hz, 1 H, H3); 2.93 (dd, *J* = 13.7, 5.6 Hz, 1 H, H5); 3.02 (dq, *J* = 10.7, 7.2 Hz, 1 H, -OCH2); 3.60 (dq, *J* = 10.6, 7.1 Hz, 1 H, -OCH2); 3.98 (br. s, 1 H, C-C5H4); 4.00 (br. s, 1 H, C-C5H4); 4.08 (s, 5 H, C5H5); 4.09 (m, 3 H, C-C5H4, -OCH2); 4.22 (dq, *J* = 10.8, 7.2 Hz, 1 H, -OCH2); 4.31 (d, *J* = 10.3 Hz, 1 H, H2); 6.99 (d, *J* = 6.6 Hz, 2 H, *o*-Ph); 7.13 (m, 3 H, *m*-, *p*-Ph). - 13C NMR (100 MHz):  = 13.3 (q, OCH2*C*H3), 13.76 (q, OCH2*C*H3), 21.1 (q, C*C*H3), 27.77 (q, C*C*H3), 27.82 (q, OC(*C*H3)3), 31.4 (t, C4), 35.78 (s, *C*CH3), 49.4 (d, C3), 57.8 (d, C5), 58.0 (d, C2), 60.7 (t, OCH2), 61.3 (t, OCH2), 66.1 (d, C5H4), 66.3 (d+s, 2 C, C1, C5H4), 67.2 (d, C5H4), 67.3 (d, C5H4), 68.48 (d, C5H5), 80.2 (s, O*C*(CH3)3), 103.0 (s, subst. C5H4), 126.9 (d, *p*-Ph), 127.66 (d, Ph), 129.2 (d, Ph), 140.5 (s, Ph), 170.3 (s, COO), 171.5 (s, COO), 173.0 (s, COO). - MS, *m/z* (%): 616 (M+, 14), 560 (2), 495 (1), 430 (3), 374 (44), 330 (61), 313 (11), 300 (24), 256 (38), 250 (100), 227 (21), 209 (11), 203 (13), 171 (38), 131 (29), 91 (13), 57 (37). - HRMS *m/z*, M+ C35H44FeO6: calcd.: 616.2487; found 616.2476  2. - *(2S*,3S*,5S*)-***16ea**: IR (film): 3095, 3030, 2979, 2934, 2908, 1727, 1456, 1392, 1367, 1250, 1154, 1106, 1042, 700. - 1H NMR (400 MHz):  = 1.087 (t, *J* = 7.1 Hz, 3 H, OCH2C*H3*); 1.093 (t, *J* = 7.1 Hz, 3 H, OCH2C*H3*); 1.12 (s, 9 H, OC(CH3)3); 1.21 (s, 3 H, CCH3); 1.34 (s, 3 H, CCH3); 1.76 (m, 1 H, -H4); 2.20 (q, *J* = 12.3 Hz, 1 H, -H4); 3.03 (m, 1 H, H5); 3.51 (ddd, *J* = 11.4, 11.3, 4.4 Hz, 1 H, H3); 3.60 (d, *J* = 11.2 Hz, 1 H, H2); 3.84-4.11 (m, 8 H, OCH2, C5H4); 4.06 (s, 5 H, C5H5); 7.11 (m, 5 H,Ph). - 13C NMR (100 MHz):  = 13.7 (q, OCH2*C*H3), 13.84 (q, OCH2*C*H3), 24.0 (q, C*C*H3), 27.2 (q, C*C*H3), 27.77 (q, OC(*C*H3)3), 29.8 (t, C4), 35.83 (s, *C*CH3), 46.5 (d, C3), 58.5 (d, C5), 59.0 (d, C2), 60.5 (t, OCH2), 61.0 (t, OCH2), 66.5 (d+s, 2 C, C1, C5H4), 66.7 (d, C5H4), 67.1 (d, C5H4), 67.2 (d, C5H4), 68.43 (d, C5H5), 80.2 (s, O*C*(CH3)3), (~103.0 s, subst. C5H4 missing), 127.1 (d, *p*-Ph), 127.61 (d, Ph), 129.0 (d, Ph), 137.0 (s, Ph), 168.6 (s, COO), 171.0 (s, COO), 174.7 (s, COO). - MS, *m/z* (%): 616 (M+, 100), 560 (32), 495 (7), 431 (33), 375 (55), 329 (13), 301 (42), 283 (13), 255 (37), 227 (85), 209 (9), 171 (21), 135 (10), 131 (11), 57 (31). - HRMS *m/z*, M+ C35H44FeO6: calcd.: 616.2487; found 616.2476  2.

*(1S*,5R*,7S*,8S*)-* **and** *(1R*,5S*,7S*,8S*)*-**7-(*tert*-Butyloxycarbonyl)-1-(ethoxycarbonyl)-4,4-dimethyl-8-phenyl-3-oxabicyclo[3.3.0]octan-2-one 17ea/18ea**: 3:1 Diastereomeric mixture as a pale yellow oil. - IR (film): 3090, 3064, 3032, 2979, 2936, 2877, 1774, 1735, 1728, 1721, 1604, 1455, 1368, 1249, 1156, 1099, 1042, 849, 752, 701. - *(1S*,5R*,7S*,8S*)*-**17ea**: 1H NMR (400 MHz):  = 0.74 (t, *J* = 7.1 Hz, 3 H, OCH2C*H3*); 1.20 (s, 9 H, OC(CH3)3); 1.28 (s, 3 H, CCH3); 1.38 (s, 3 H, CCH3); 1.92 (q, *J* = 12.3 Hz, 1 H, -H4); 2.21 (ddd, *J* = 12.3, 6.9, 5.4 Hz, 1 H, -H4); 3.19 (dd, *J* = 12.1, 7.0 Hz, 1 H, H5); 3.24 (dt, *J* = 12.1, 5.3 Hz, 1 H, H3); 3.60 (2 dq, *J* = 10.7, 7.1 Hz, 2 H, OCH2); 3.86 (d, *J* = 11.8 Hz, 1 H, H2); 7.19 (m, 3 H, Ph); 7.34 (d, *J* = 7.4 Hz, 2 H, Ph). - 13C NMR (100 MHz):  = 13.4 (q, OCH2*C*H3), 23.5 (q, C*C*H3), 27.8 (q, OC(*C*H3)3), 29.4 (q, C*C*H3), 32.0 (t, C4), 50.4 (d, C3), 54.8 (d, C5), 56.8 (d, C2), 61.9 (t, OCH2), 66.9 (s, C1), 81.2 (s, O*C*(CH3)3), 82.6 (s, OCMe2), 127.4 (d, *p*-Ph), 127.9 (d, Ph), 128.8 (d, Ph), 136.5 (s, Ph), 168.9 (s, COO), 171.3 (s, COO), 174.5 (s, COO). - *(1R*,5S*,7S*,8S*)*-**18ea**: 1H NMR (400 MHz):  = 1.12 (s, 9 H, OC(C*H3*)3); 1.20 (t, *J* = 7.1 Hz, 3 H, OCH2C*H3*); 1.44 (s, 6 H, C(*C*H3)2); 2.13 (m, 1 H, -H4); 2.23 (m, 1 H, -H4); 2.94 (m, 2 H, H3, H5); 4.07 (d, *J* = 12.9 Hz, 1 H, H2); 4.18 (m, 2 H, OCH2); 7.14 (m, 5 H, Ph). - 13C NMR (100 MHz):  = 13.9 (q, OCH2*C*H3), 24.5 (q, C*C*H3), 27.7 (q, OC(*C*H3)3), 31.2 (q, C*C*H3), 31.6 (t, C4), 48.8 (d, C3), 53.5 (d, C5), 56.3 (d, C2), 62.4 (t, OCH2), 66.6 (s, C1), 81.1 (s, O*C*(CH3)3), 84.1 (s, OCMe2), 127.6 (d, *p*-Ph), 127.7 (d, Ph), 129.2 (d, Ph), 134.9 (s, Ph), 170.1 (s, COO), 171.6 (s, COO), 1 C not detected (s, COO). - MS, *m/z* (%): 402 (M+, 2), 374 (11), 346 (100), 329 (16), 300 (70), 273 (19), 256 (51), 239 (17), 227 (12), 214 (61), 186 (46), 169 (20), 147 (24), 141 (22), 115 (24), 105 (56), 84 (38), 57 (97). - HRMS *m/z*, M+-Me2C=CH2 C19H22O6: calcd.: 346.1416 found: 346.1414

**Diethyl 3-(*tert*-Butoxycarbonyl)-5-isopropenyl-2-methylcyclopentan-1,1-dicarboxylates 12eb/13eb**: Pale yellow oil as a partly separable 26.4:6.4:3.2:1 (**12eb/13eb** 7.8:1) mixture of four diastereomers accompanied by **14eb**. - IR (film): 3085, 2980, 2938, 1728, 1458, 1368, 1254, 1196, 1155, 1095, 1079, 896, 851. - *(2R*,3S*,5S*)-***12eb**: 1H NMR (400 MHz):  = 0.97 (d, *J* = 6.8 Hz, 3 H, CHC*H3*); 1.145 (t, *J* = 7.2 Hz, 3 H, OCH2C*H3*); 1.20 (t, *J* = 7.1 Hz, 3 H, OCH2C*H3*); 1.396 (s, 9 H, OC(CH3)3); 1.67 (br. s, 3 H, H3CC=); 1.88 (ddd, *J* = 12.9, 10.2, 8.8 Hz, 1 H, -H4); 2.18 (dt, *J* = 12.9, 8.0 Hz, 1 H, -H4); 2.30 (dt, *J* = 10.6, 8.4 Hz, 1 H, H3); 3.04 (dq, 10.9, 6.8 Hz, 1 H, H2); 3.35 (dd, *J* = 8.7, 8.1 Hz, 1 H, H5); 3.97 (dq, *J* = 10.7, 7.1 Hz, 1 H, OCH2); 4.09 (m, 2 H, OCH2); 4.17 (dq, *J* = 10.7, 7.1 Hz, 1 H, OCH2); 4.73 (d, *J* = 1.0 Hz, 2 H, =CH2). - 13C NMR (100 MHz):  = 13.82 (q, OCH2*C*H3), 14.07 (q, OCH2*C*H3), 15.8 (q, CH*C*H3), 22.5 (q, H3*C*C=), 28.0 (q, OC(*C*H3)3), 33.9 (t, C4), 43.8 (d, C2), 50.5 (d, C3), 50.8 (d, C5), 60.8 (t, OCH2), 61.04 (t, OCH2), 67.4 (s, C1), 80.37 (s, O*C*(CH3)3), 113.4 (t, =CH2), 145.6 (s, C=), 170.1 (s, COO), 171.1 (s, COO), 173.62 (s, COO). - *(2R*,3S*,5R*)-***12eb**: 1H NMR (400 MHz):  = 1.14 (m, 3 H, CHC*H3*); 1.17 (t, *J* = 7.2 Hz, 3 H, OCH2C*H3*); 1.21 (t, *J* = 7.1 Hz, 3 H, OCH2C*H3*); 1.391 (s, 9 H, OC(CH3)3); 1.69 (br. s, 3 H, H3CC=); 1.98 (ddd, *J* = 13.3, 8.8, 4.5 Hz, 1 H, -H4); 2.23 (m, 1 H, -H4); 2.48 (dq, 9.9, 6.8 Hz, 1 H, H2); 2.79 (dt, *J* = 11.2, 4.5 Hz, 1 H, H3); 3.28 (dd, *J* = 11.4, 8.9 Hz, 1 H, H5); 3.88-4.22 (m, 4 H, 2 OCH2); 4.73 (br. s, 1 H, =CH2); 4.75 (br. s, 1 H, =CH2). - 13C NMR (100 MHz):  = 13.98 (q, 2 C, 2 OCH2*C*H3), 14.5 (q, CH*C*H3), 23.1 (q, H3*C*C=), 28.1 (q, OC(*C*H3)3), 32.0 (t, C4), 47.4 (d, C2), 49.1 (d, C5), 51.7 (d, C3), 60.50 (t, OCH2), 60.98 (t, OCH2), 69.0 (s, C1), 80.32 (s, O*C*(CH3)3), 112.6 (t, =CH2), 143.8 (s, C=), 168.9 (s, COO), 173.60 (s, COO), 175.1 (s, COO). - *(2R*,3R*,5S*)-***13eb**: 1H NMR (400 MHz):  = 0.82 (d, *J* = 7.3 Hz, 3 H, CHC*H3*); 1.13 (t, *J* = 7.1 Hz, 3 H, OCH2C*H3*); 1.18 (t, *J* = 7.1 Hz, 3 H, OCH2C*H3*); 1.387 (s, 9 H, OC(CH3)3); 1.66 (br. s, 3 H, H3CC=); 1.81 (m, 1 H, -H4); 2.26 (m, 1 H, -H4); 3.06 (m, 1 H, H2); 3.41 (m, 1 H, H3); 3.62 (dd, *J* = 10.0, 6.9 Hz, 1 H, H5); 3.88-4.22 (m, 4 H, 2 OCH2); 4.73 (br. s, 2 H, =CH2). - 13C NMR (100 MHz):  = 12.7 (q, OCH2*C*H3), 13.77 (q, OCH2*C*H3), 14.01 (q, CH*C*H3), 23.5 (q, H3*C*C=), 28.0 (q, OC(*C*H3)3), 30.7 (t, C4), 42.9 (d, C2), 47.8 (d, C3), 48.1 (d, C5), 60.9 (t, OCH2), 66.4 (s, C1), 80.37 (s, O*C*(CH3)3), 112.1 (t, =CH2), 145.7 (s, C=), 170.3 (s, COO), 170.8 (s, COO), 172.9 (s, COO). - *(2R*,3R*,5R*)-***13eb**: 1H NMR (400 MHz):  = 1.14 (d, *J* = 7.0 Hz, 3 H, CHC*H3*); 1.16 (t, *J* = 7.1 Hz, 3 H, OCH2C*H3*); 1.21 (t, *J* = 7.1 Hz, 3 H, OCH2C*H3*); 1.403 (s, 9 H, OC(CH3)3); 1.72 (br. s, 3 H, H3CC=); 1.84 (m, 1 H, -H4); 2.50 (dt, *J* = 13.2, 10.5 Hz, 1 H, -H4); 2.79 (dq, 10.9, 7.2 Hz, 1 H, H2); 2.87 (dt, *J* = 10.7, 7.2 Hz, 1 H, H3); 3.04 (m, 1 H, H5); 4.03 (2 q, *J* = 7.1 Hz, 2 H, OCH2); 4.16 (2 q, *J* = 7.1 Hz, 2 H,OCH2); 4.79 (br. s, 1 H, =CH2); 4.81 (br. s, 1 H, =CH2). - 13C NMR (100 MHz):  = 13.4 (q, OCH2*C*H3), 13.98 (q, OCH2*C*H3), 14.01 (q, CH*C*H3), 23.5 (q, H3*C*C=), 28.2 (q, OC(*C*H3)3), 31.6 (t, C4), 44.7 (d, C2), 45.6 (d, C3), 51.1 (d, C5), 60.52 (t, OCH2), 61.3 (t, OCH2), 66.4 (s, C1), 80.41 (s, O*C*(CH3)3), 112.8 (t, =CH2), 143.7 (s, C=), 168.4 (s, COO), 172.2 (br. s, 2 COO). - MS, *m/z* (%): 368 (M+, 3), 312 (58), 295 (22), 267 (33), 238 (87), 220 (25), 192 (100), 165 (24), 147 (43), 141 (11), 121 (24), 57 (54). - C20H32O6 (368.46): calcd. C 65.19 H 8.75; found C 65.31 H 9.04.

*(2R*,3S*,5S*)-***Diethyl 3-(*tert*-Butyloxycarbonyl)-5-isopropyl-2-methylcyclopentan-1,1-dicarboxylate 14eb**: 1H NMR (400 MHz):  = 0.75 (d, *J* = 6.7 Hz, 3 H, H3CCHC*H3*); 0.85 (d, *J* = 6.8 Hz, 3 H, H3CCHC*H3*); 0.94 (d, *J* = 7.0 Hz, 3 H, CHC*H3*); 1.13-1.23 (m, 6 H, 2 OCH2C*H3*); 1.396 (s, 9 H, OC(CH3)3); 1.63 (m, 1 H, -H4); 1.74 (m, 1 H, (H3C)2C*H*); 1.98 (m, 1 H, -H4); 2.26 (m, 1 H, H3); 2.58 (m, 1 H, H5); 2.91 (m, 1 H, H2); 3.88-4.22 (m, 4 H, 2 OCH2). - 13C NMR (100 MHz) (detectable resonances):  = 16.7 (q, CH*C*H3), 18.6 (q, CH*C*H3), 23.0 (q, CH*C*H3), 28.0 (q, OC(*C*H3)3), 28.6 (d, (H3C)2*C*H), 29.3 (t, C4), 49.9 (d, C3), 50.4 (d, C5), 80.1 (s, O*C*(CH3)3).

*(2R*,3S*,5R*)-* **and** *(2R*,3S*,5S*)-***Diethyl 3-(*tert*-Butyloxycarbonyl)-5-(1-ferrocenyl-1-methylethyl)-2-methylcyclopentane-1,1-dicarboxylate 16eb**: Orange oil as a partly separable 2:1 diastereomeric mixture. - *(2R*,3S*,5R*)-***16eb**: IR (film): 3095, 2979, 2939, 2904, 2877, 1725, 1722, 1644, 1460, 1390, 1367, 1305, 1249, 1156, 1105, 1039, 852, 821. - 1H NMR (400 MHz):  = 0.85 (d, *J* = 7.1 Hz, 3 H, CHC*H3*); 1.12 (br. s, 3 H, CCH3); 1.21 (t, *J* = 7.1 Hz, 3 H, OCH2C*H3*); 1.22 (t, *J* = 7.1 Hz, 3 H, OCH2C*H3*); 1.36 (s, 9 H, OC(CH3)3); 1.38 (br. s, 3 H, CCH3); 1.59 (m, 1 H, -H4); 1.79 (q, *J* = 12.0 Hz, 1 H, -H4); 1.96 (dt, *J* = 10.5, 8.3 Hz, 1 H, H3); 2.66 (dd, *J* = 11.8, 6.3 Hz, 1 H, H5); 2.96 (m, 1 H, H2); 3.99-4.20 (m, 8 H, C5H4, 2 OCH2); 4.08 (s, 5 H, C5H5). - 13C NMR (100 MHz):  = 13.7 (q, OCH2*C*H3), 14.1 (q, OCH2*C*H3), 17.7 (q, CHCH3), 21.9 (q, C*C*H3), 27.6 (q, C*C*H3), 28.1 (q, OC(*C*H3)3), 30.3 (t, C4), 35.8 (s, *C*(CH3)2), 45.4 (d, C2), 50.0 (d, C3), 56.1 (d, C5), 60.8 (t, OCH2), 61.0 (t, OCH2), 64.6 (s, C1), 66.4 (br. d, 2 C, C5H4), 67.2 (d, C5H4), 67.4 (d, C5H4), 68.6 (d, C5H5), 80.1 (s, O*C*(CH3)3), (~103.0 s, subst. C5H4 not detected), 170.8 (s, COO), 171.4 (s, COO), 173.7 (s, COO). - MS, *m/z* (%): 554 (M+, 91), 498 (22), 433 (8), 387 (2), 312 (6), 267 (6), 238 (9), 227 (100), 212 (8), 194 (10), 186 (12), 121 (7), 57 (15). - HRMS *m/z*, M+ C30H42FeO6: calcd. 554.2331, found 554.23192. - *(2R*,3S*,5S*)-***16eb**: IR (film): 3097, 2979, 2937, 2908, 1726, 1459, 1392, 1367, 1250, 1155, 1106, 1039, 818. - 1H NMR (400 MHz):  = 0.98 (d, *J* = 6.8 Hz, 3 H, CHC*H3*); 1.19 (br. s, 3 H, CCH3); 1.217 (t, *J* = 7.1 Hz, 3 H, OCH2C*H3*); 1.225 (t, *J* = 7.1 Hz, 3 H, OCH2C*H3*); 1.33 (s, 9 H, OC(CH3)3); 1.38 (s, 3 H, CCH3); 1.69 (m, 1 H, -H4); 2.02 (q, *J* = 12.5 Hz, 1 H, -H4); 2.30 (dq, *J* = 10.1, 6.8 Hz, 1 H, H2); 2.68 (m, 1 H, H3); 2.93 (dd, *J* = 12.0, 8.4 Hz, 1 H, H5); 4.04-4.15 (m, 8 H, C5H4, 2OCH2); 4.15 (br. s, 5 H, C5H5). - 13C NMR (100 MHz):  = 13.94 (q, OCH2*C*H3), 13.96 (q, OCH2*C*H3), 14.02 (q, CH*C*H3), 23.8 (q, C*C*H3), 27.3 (q, C*C*H3), 28.0 (q, OC(*C*H3)3), 30.1 (t, C4), 35.6 (s, *C*(CH3)2), 48.9 (d, C2), 49.6 (d, C3), 56.6 (d, C5), 60.5 (t, OCH2), 61.0 (t, OCH2), 65.2 (s, C1), 66.6 (d, C5H4), 66.9 (d, C5H4), 67.3 (d, C5H4), 67.5 (d, C5H4), 68.8 (d, C5H5), 80.2 (s, O*C*(CH3)3), 101.5 (s, subst. C5H4), 169.3 (s, COO), 171.2 (s, COO), 175.3 (s, COO). - MS, *m/z* (%): 554 (M+, 100), 498 (36), 433 (5), 387 (6), 313 (6), 227 (96), 212 (9), 186 (17), 121 (7), 57 (8). - HRMS *m/z*, M+ C30H42FeO6: calcd. 554.2331, found 554.23192.

**7-(*tert*-Butyloxycarbonyl)-1-(ethoxycarbonyl)-4,4,8-trimethyl-3-oxabicyclo[3.3.0]octan-2-ones 17eb, 18eb**: Partly separable (4.8:1):(5.5:2.6) mixture of four diastereomers of **17eb:18eb** as a pale yellow oil. - IR (film): 2981, 2938, 1767, 1728, 1459, 1392, 1369, 1267, 1247, 1154, 1116, 1058, 1026. - *(1S*,5R*,7S*,8R*)-***17eb**: 1H NMR (400 MHz):  = 1.10 (d, *J* = 6.9 Hz, 3 H, CHC*H3*); 1.24 (t, *J* = 7.1 Hz, 3 H, OCH2C*H3*); 1.27 (s, 3 H, -CCH3); 1.34 (s, 3 H, -CCH3); 1.382 (s, 9 H, OC(CH3)3); 1.78 (q, *J* = 12.2 Hz, 1 H, -H4); 2.04 (ddd, *J* = 12.3, 7.2, 5.4 Hz, 1 H, -H4); 2.46 (ddd, *J* = 12.1, 11.2, 5.4 Hz, 1 H, H3); 2.60 (dq, *J* = 11.1, 6.9 Hz, 1 H, H2); 3.01 (m, 1 H, H5); 4.21 (m, 2 H, OCH2). - 13C NMR (100 MHz):  = 14.13 (q, OCH2*C*H3), 14.8 (q, CH*C*H3), 23.6 (q, C*C*H3), 28.0 (q, C(*C*H3)3), 29.6 (q, C*C*H3), 32.0 (t, C4), 46.7 (d, C2), 53.5 (d, C3), 54.6 (d, C5), 62.1 (t, OCH2), 65.2 (s, C1), 81.09 (s, O*C*(CH3)3), 82.8 (s, O*C*Me2), 169.6 (s, COO), 171.8 (s, COO), 174.6 (s, COO). - *(1S*,5R*,7R*,8R*)-***17eb**: 1H NMR (400 MHz):  = 0.87 (d, *J* = 7.2 Hz, 3 H, CHC*H3*); 1.29 (t, *J* = 7.2 Hz, 3 H, OCH2C*H3*); 1.35 (s, 3 H, -CCH3); 1.38 (s, 3 H, -CCH3); 1.40 (s, 9 H, OC(CH3)3); 1.97 (ddd, *J* = 14.4, 7.0, 2.6, 1 H, -H4); 2.20 (ddd, *J* = 14.4, 12.4, 10.5 Hz, 1 H, -H4); 2.72 (dt, *J* = 12.5, 6.2 Hz, 1 H, H3); 3.06 (m, 1 H, H2); 3.25 (dd, *J* = 10.4, 2.5 Hz, 1 H, H5); 4.21 (m, 2 H, OCH2). - 13C NMR (100 MHz):  = 11.8 (q, CH*C*H3), 14.10 (q, OCH2*C*H3), 24.7 (q, C*C*H3), 27.3 (t, C4), 28.07 (q, OC(*C*H3)3), 29.2 (q, C*C*H3), 45.0 (d, C2), 48.5 (d, C3), 48.7 (d, C5), 62.3 (t, OCH2), 68.8 (s, C1), 81.04 (s, O*C*(CH3)3), 84.7 (s, O*C*Me2), 168.1 (s, COO), 171.0 (s, COO), 173.8 (s, COO). - *(1R*,5S*,7S*,8R*)-***18eb**: 1H NMR (400 MHz):  = 0.98 (d, *J* = 7.4 Hz, 3 H, CHC*H3*); 1.20 (t, *J* = 7.1 Hz, 3 H, OCH2C*H3*); 1.25 (s, 3 H, CCH3); 1.40 (s, 9 H, OC(CH3)3); 1.44 (s, 3 H, CCH3); 1.92 (ddd, *J* = 13.5, 9.0, 6.7 Hz, 1 H, -H4); 2.11 (ddd, *J* = 13.3, 11.4, 9.9 Hz, 1 H, -H4); 2.86 (t, *J* = 9.4 Hz, 1 H, H5); 2.95 (dt, *J* = 11.5, 6.7 Hz, 1 H, H3); 3.01 (dq, *J* = 11.8, 7.3 Hz, 1 H, H2); 4.21 (m, 2 H, OCH2). - 13C NMR (100 MHz):  = 11.9 (q, CH*C*H3), 13.93 (q, OCH2*C*H3), 24.6 (q, C*C*H3), 28.1 (q, C(*C*H3)3), 28.7 (q, C*C*H3), 30.8 (t, C4), 42.5 (d, C2), 50.4 (d, C3), 54.3 (d, C5), 62.34 (t, OCH2), 67.2 (s, C1), 81.11 (s, O*C*(CH3)3), 83.6 (s, O*C*Me2), 171.1 (s, COO), 171.3 (s, COO), 171.8 (s, COO). - *(1R*,5S*,7R*,8R*)-***18eb**: 1H NMR (400 MHz):  = 1.16 (d, *J* = 6.9 Hz, 3 H, CHC*H3*); 1.23 (m, 3 H, OCH2C*H3*); 1.35 (s, 3 H, CCH3); 1.39 (s, 9 H, OC(CH3)3); 1.43 (s, 3 H, CCH3); 1.95 (m, 1 H, -H4); 2.11 (m, 2 H, H3, -H4); 2.77 (dq, *J* = 11.7, 6.9 Hz, 1 H, H2); 2.91 (m, 1 H, H5); 4.21 (m, 2 H, OCH2). - 13C NMR (100 MHz):  = 13.3 (q, OCH2*C*H3), 14.13 (q, CH*C*H3), 24.4 (q, C*C*H3), 28.0 (q, C(*C*H3)3), 29.2 (q, C*C*H3), 31.9 (t, C4), 46.4 (d, C2), 51.4 (d, C3), 52.7 (d, C5), 62.28 (t, OCH2), 65.5 (s, C1), 84.5 (s, O*C*Me2), 170.0 (s, COO), 171.6 (s, COO), 172.3 (s, COO). - MS, *m/z* (%): 340 (M+, 0.2), 284 (27), 267 (28), 239 (27), 194 (83), 185 (65), 167 (13), 149 (21), 121 (25), 107 (14), 79 (14), 57 (100). C18H28O6 (340.41): calcd. C 63.51 H 8.29; found C 63.68 H 8.56.
